# Supplementary material
Source: PubMed Central journal article supplement (PMC5655511)

## Supplementary Annotations: Glycopeptide identified from Ectopic expression of Flag-NleB1

### HCD fragmentation

| Sequence           | Peptide Mass | Gene Names | Protein Names                                                         | Identification     |                                     |                                     |                                     | Charges | Score  | Delta score | MS/MS |      |
|--------------------|--------------|------------|-----------------------------------------------------------------------|--------------------|-------------------------------------|-------------------------------------|-------------------------------------|---------|--------|-------------|-------|------|
|                    |              |            |                                                                       | type 1 (NleB1 DXD) | Identification type 2 (NleB1 WT B1) | Identification type 3 (NleB1 WT B2) | Identification type 4 (NleB1 WT B3) |         |        |             | Count | Page |
| IAYQRNDDEEEAARER   | 2282.0047    | CALD1      | Caldesmon                                                             |                    | By MS/MS                            | By MS/MS                            | By MS/MS                            | 3;4     | 148.2  | 142.94      | 7     | 3    |
| NDDDEEEAARER       | 1650.6605    | CALD1      | Caldesmon                                                             |                    | By MS/MS                            | By MS/MS                            | By MS/MS                            | 3       | 251.87 | 229.98      | 8     | 4    |
| NDDDEEEAARERR      | 1806.7616    | CALD1      | Caldesmon                                                             |                    | By matching                         | By MS/MS                            | By matching                         | 4       | 67.646 | 61.169      | 2     | 5    |
| KTPEELLRQNQR       | 1713.901     | CHMP2A     | Charged multivesicular body protein 2a                                |                    | By MS/MS                            | By MS/MS                            | By MS/MS                            | 3       | 128.76 | 112.15      | 7     | 6    |
| TPEELLRQNQR        | 1585.806     | CHMP2A     | Charged multivesicular body protein 2a                                |                    | By MS/MS                            | By MS/MS                            | By MS/MS                            | 3       | 242.48 | 218.13      | 4     | 7    |
| MRNGIDILVGTPGR     | 1700.888     | DDX21      | Nucleolar RNA helicase 2                                              |                    | By MS/MS                            | By matching                         |                                     | 3       | 84.94  | 70.664      | 1     | 8    |
| RLARQLK            | 1086.6509    | FADD       | FAS-associated death domain protein                                   |                    | By MS/MS                            | By MS/MS                            | By matching                         | 3       | 93.166 | 29.205      | 4     | 9    |
| RVANIARTNATNNMNSLR | 2218.1237    | HECTD1     | E3 ubiquitin-protein ligase HECTD1                                    |                    | By MS/MS                            |                                     | By matching                         | 4       | 43.233 | 36.63       | 1     | 10   |
| VANIARTNATNNMNSLR  | 2062.0225    | HECTD1     | E3 ubiquitin-protein ligase HECTD1                                    |                    | By MS/MS                            | By MS/MS                            | By MS/MS                            | 3       | 104.38 | 87.028      | 5     | 11   |
| ALSPAELRALEAEK     | 1699.8992    | SCRIB      | Protein scribble homolog                                              |                    | By MS/MS                            | By matching                         | By matching                         | 3       | 98.573 | 46.776      | 1     | 12   |
| VYSTSVTGSREIK      | 1628.8257    | SH3BGL3    | SH3 domain-binding glutamic acid rich-like protein 3                  |                    | By MS/MS                            | By MS/MS                            | By MS/MS                            | 3       | 112.67 | 101.62      | 5     | 13   |
| KVGRSLQR           | 1145.6517    | TRADD      | Tumor necrosis factor receptor type 1-associated DEATH domain protein |                    | By MS/MS                            | By MS/MS                            |                                     | 3       | 121.6  | 77.833      | 2     | 14   |
| VGRSLQR            | 1017.5567    | TRADD      | Tumor necrosis factor receptor type 1-associated DEATH domain protein |                    |                                     | By MS/MS                            |                                     | 2       | 87.639 | 28.659      | 1     | 15   |
| VINQEELRR          | 1358.7154    | ZNF830     | Zinc finger protein 830                                               |                    | By MS/MS                            | By MS/MS                            | By matching                         | 3       | 69.721 | 16.273      | 2     | 16   |
| ILALVRNR           | 1156.6928    | DDX39A     | ATP-dependent RNA helicase DDX39A                                     |                    | By matching                         | By MS/MS                            |                                     | 3       | 83.623 | 36.02       | 1     | 17   |

### ETD fragmentation

| Sequence     | Peptide Mass | Gene Names | Protein Names                                                         | Identification     |                                     |                                     |                                     | Charges | Score | Delta score | MS/MS Count | Page             |
|--------------|--------------|------------|-----------------------------------------------------------------------|--------------------|-------------------------------------|-------------------------------------|-------------------------------------|---------|-------|-------------|-------------|------------------|
|              |              |            |                                                                       | type 1 (NleB1 DXD) | Identification type 2 (NleB1 WT B1) | Identification type 3 (NleB1 WT B2) | Identification type 4 (NleB1 WT B3) |         |       |             |             |                  |
| NDDDEEEAARER | 1650.6605    | CALD1      | Caldesmon                                                             |                    | By MS/MS                            | By MS/MS                            | By MS/MS                            | 3       | -     | -           | 8           | <b>18</b>        |
| TPEELLRQNQR  | 1585.806     | CHMP2A     | Charged multivesicular body protein 2a                                |                    | By MS/MS                            | By MS/MS                            | By MS/MS                            | 3       | -     | -           | 4           | <b>19 and 20</b> |
| RLARQLK      | 1086.6509    | FADD       | FAS-associated death domain protein                                   |                    | By MS/MS                            | By MS/MS                            | By matching                         | 3       | -     | -           | 4           | <b>21</b>        |
| KVGRSLQR     | 1145.6517    | TRADD      | Tumor necrosis factor receptor type 1-associated DEATH domain protein |                    | By MS/MS                            | By MS/MS                            |                                     | 3       | -     | -           | 2           | <b>22</b>        |
| ILALVRNR     | 1156.6928    | DDX39A     | ATP-dependent RNA helicase DDX39A                                     |                    | By matching                         | By MS/MS                            |                                     | 3       | -     | -           | 1           | <b>23</b>        |

# HCD fragmentation

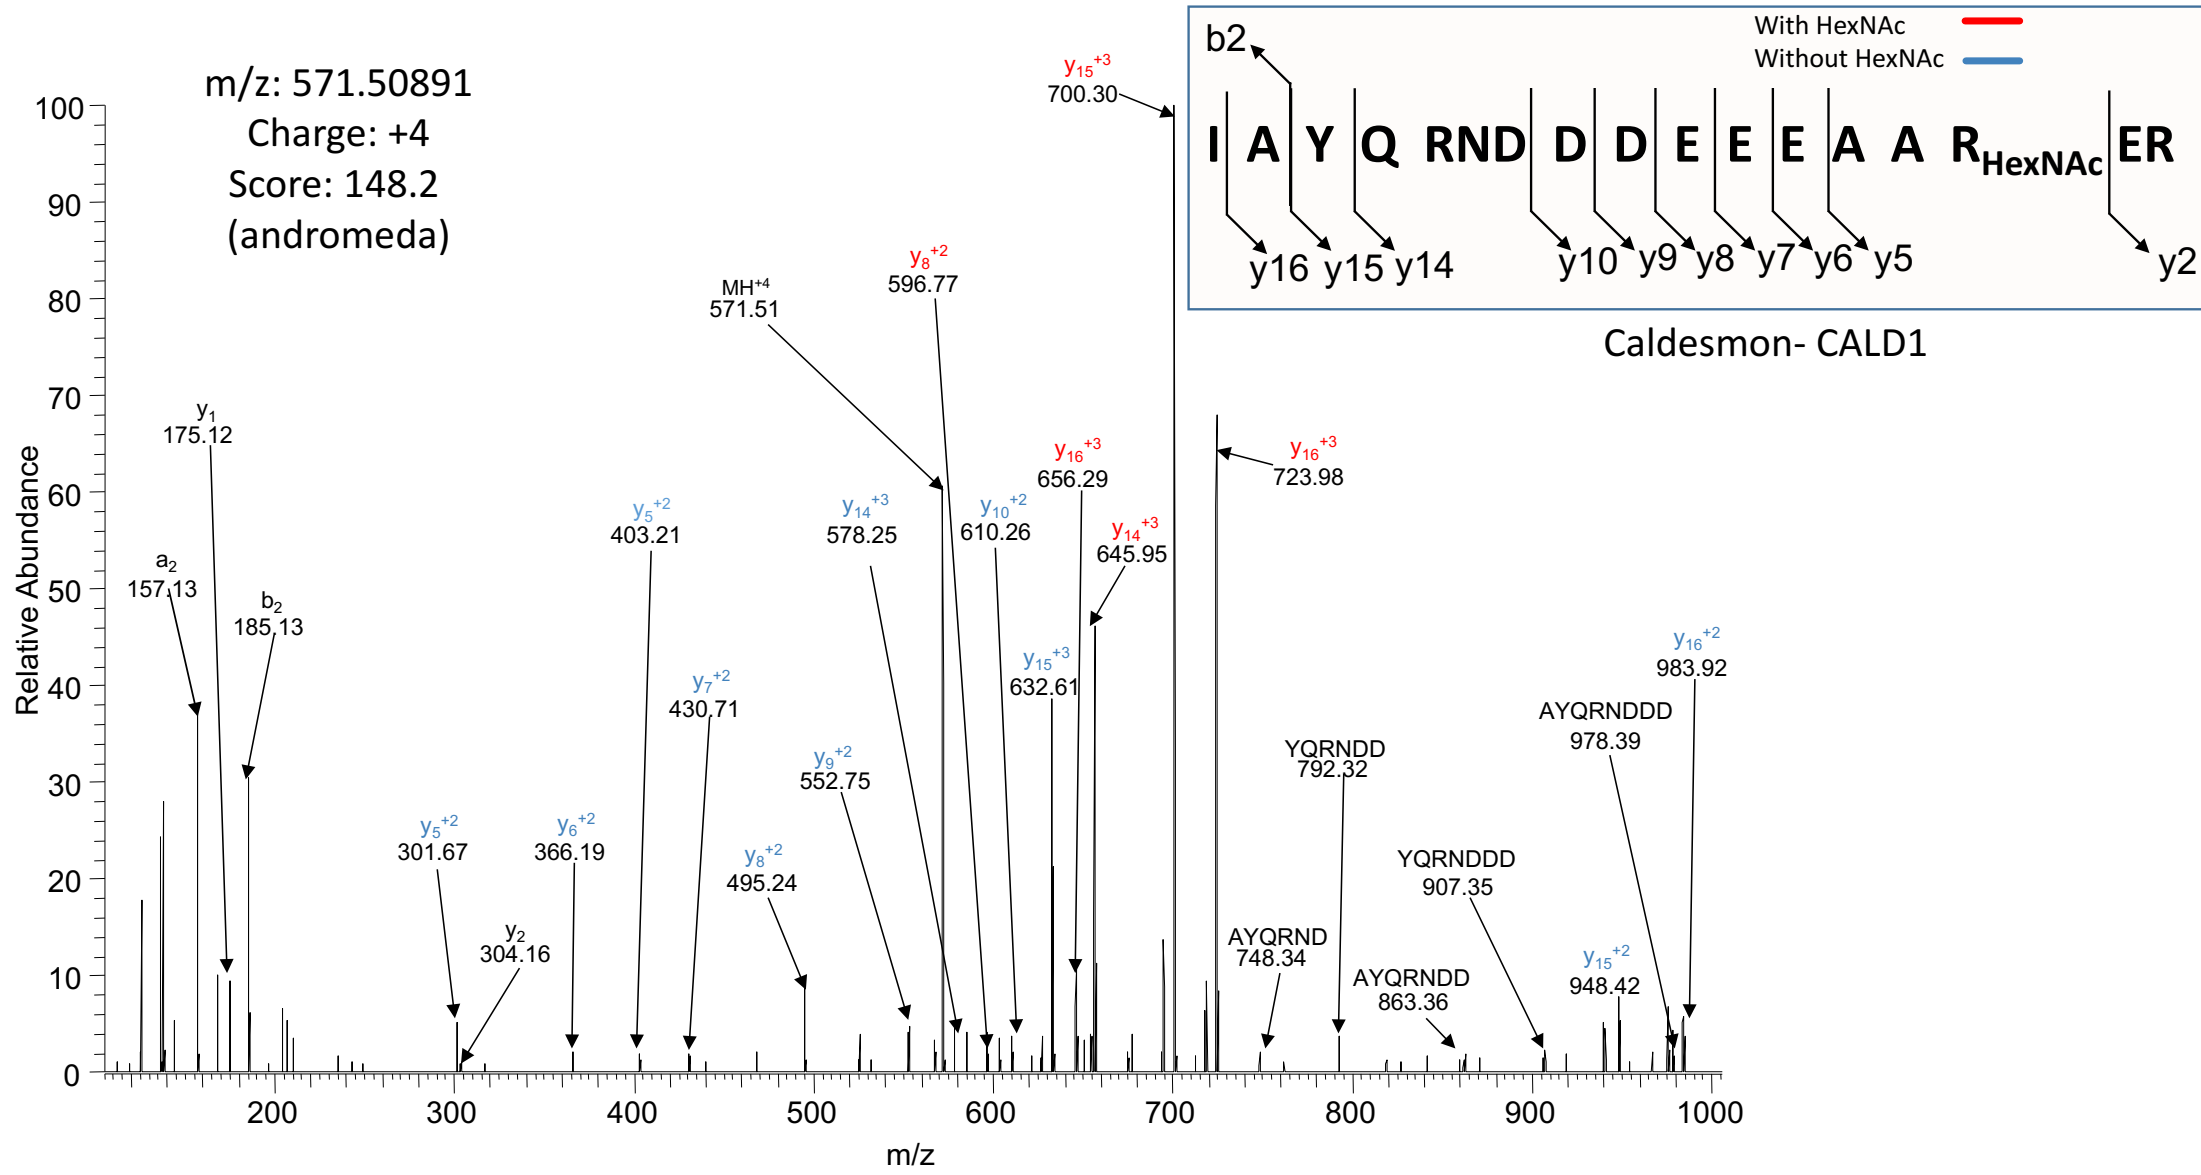

# HCD fragmentation

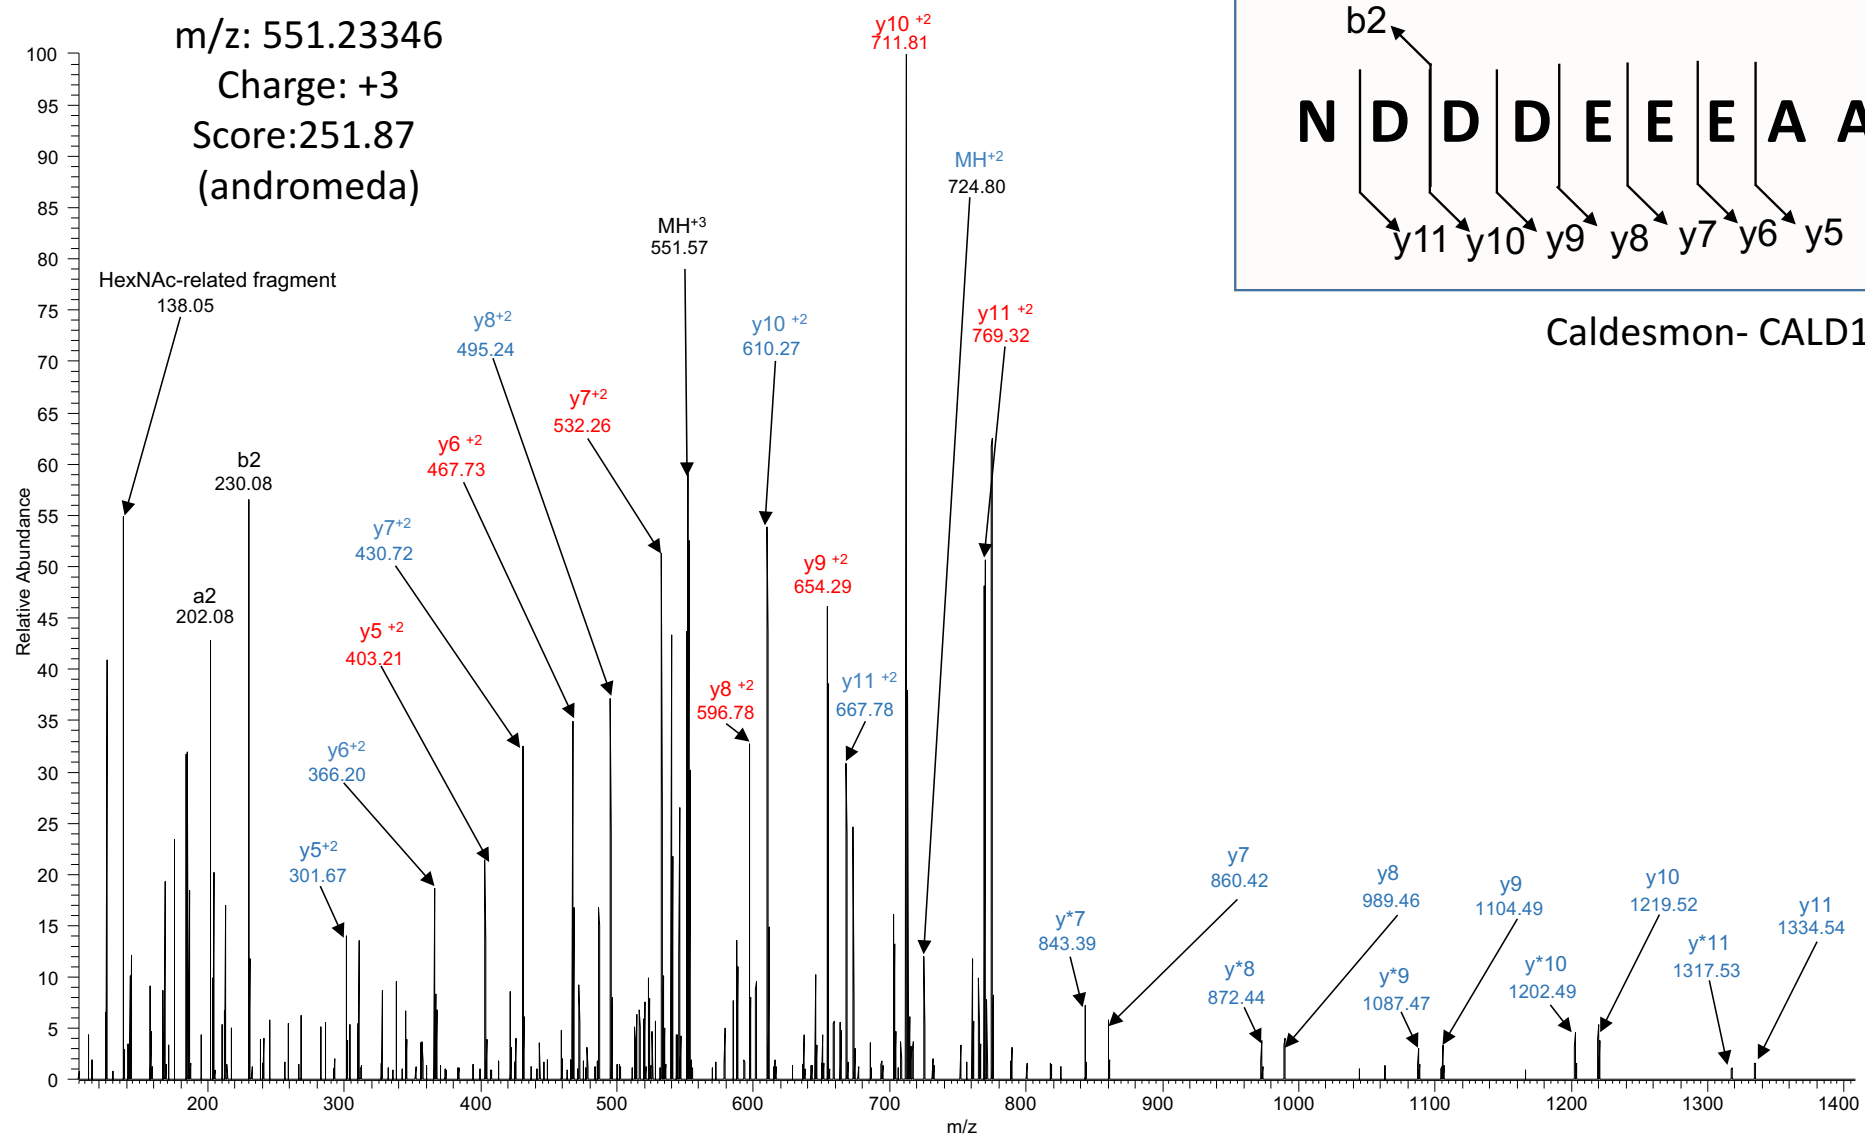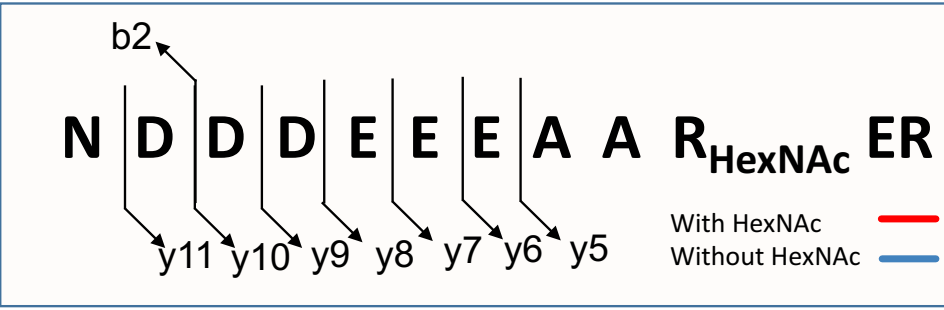

Caldesmon- CALD1

# HCD fragmentation

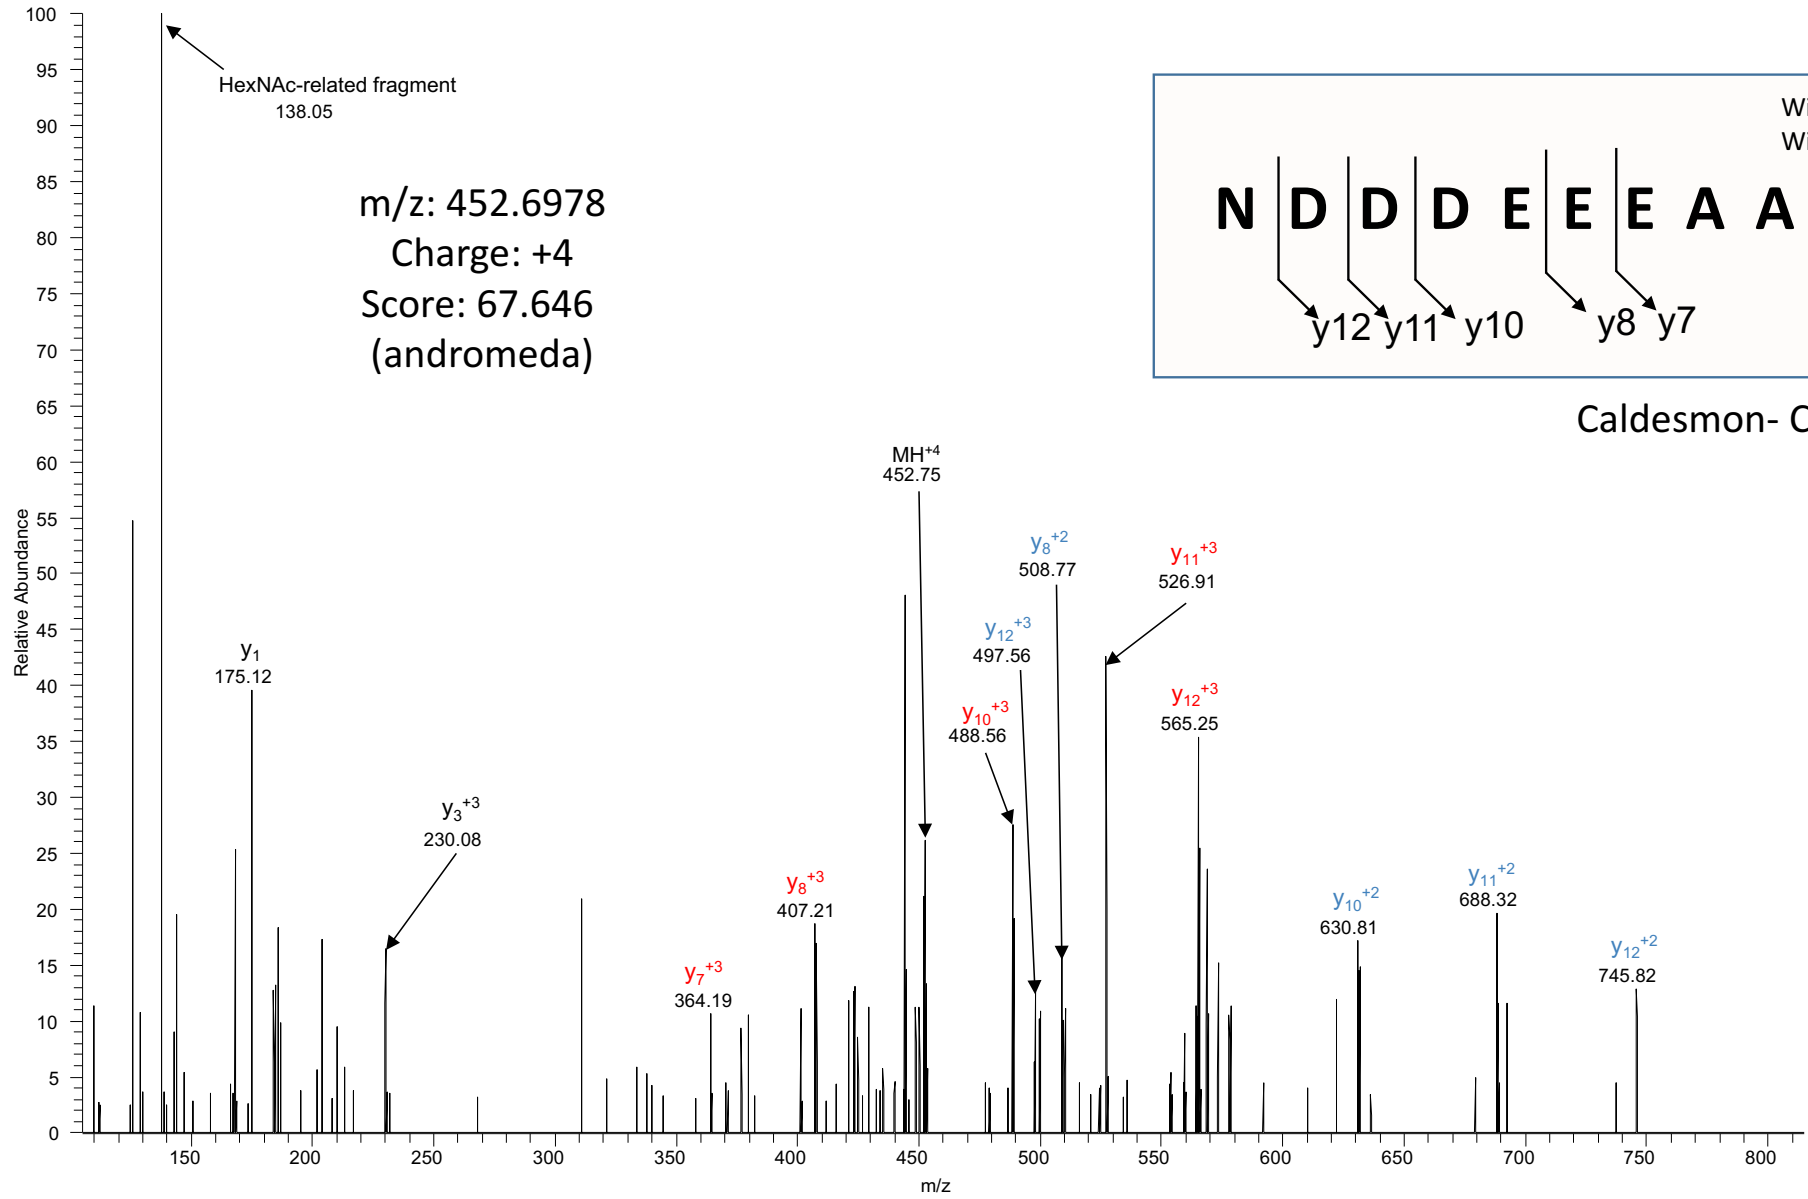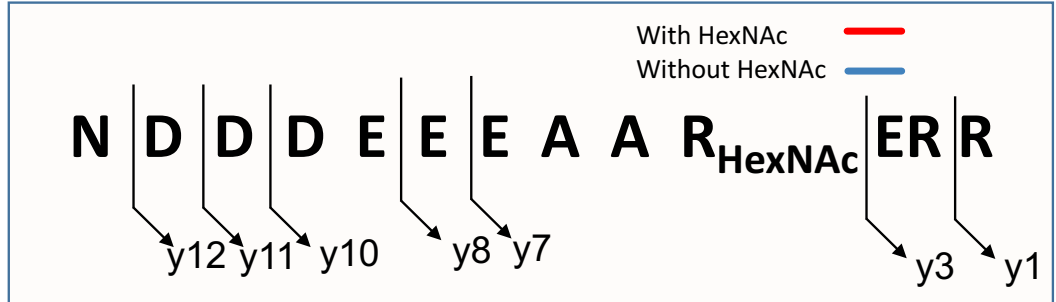

Caldesmon- CALD1

# HCD fragmentation

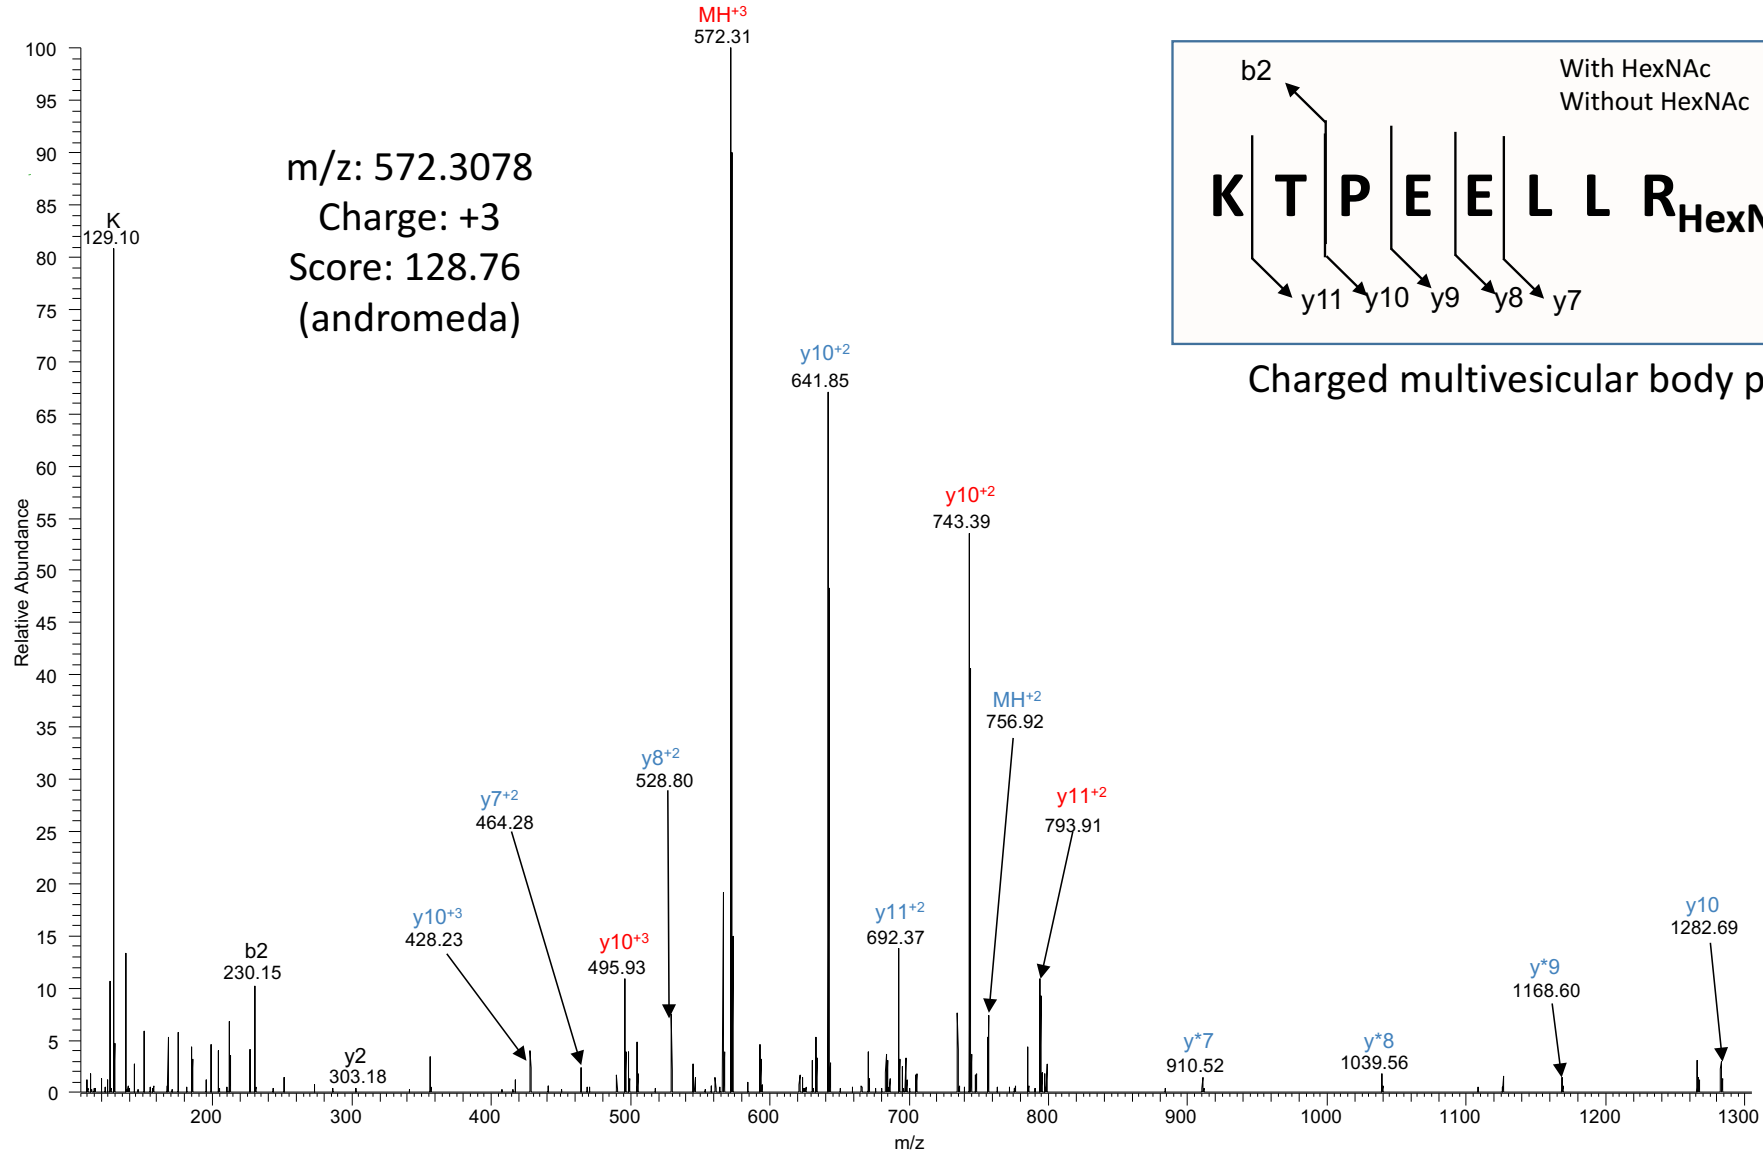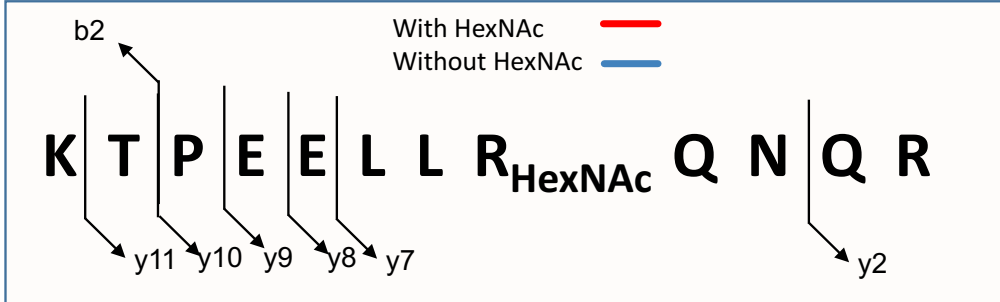

Charged multivesicular body protein 2a- CHMP2A

# HCD fragmentation

m/z: 529.61008  
 Charge: +3  
 Score: 242.48  
 (andromeda)

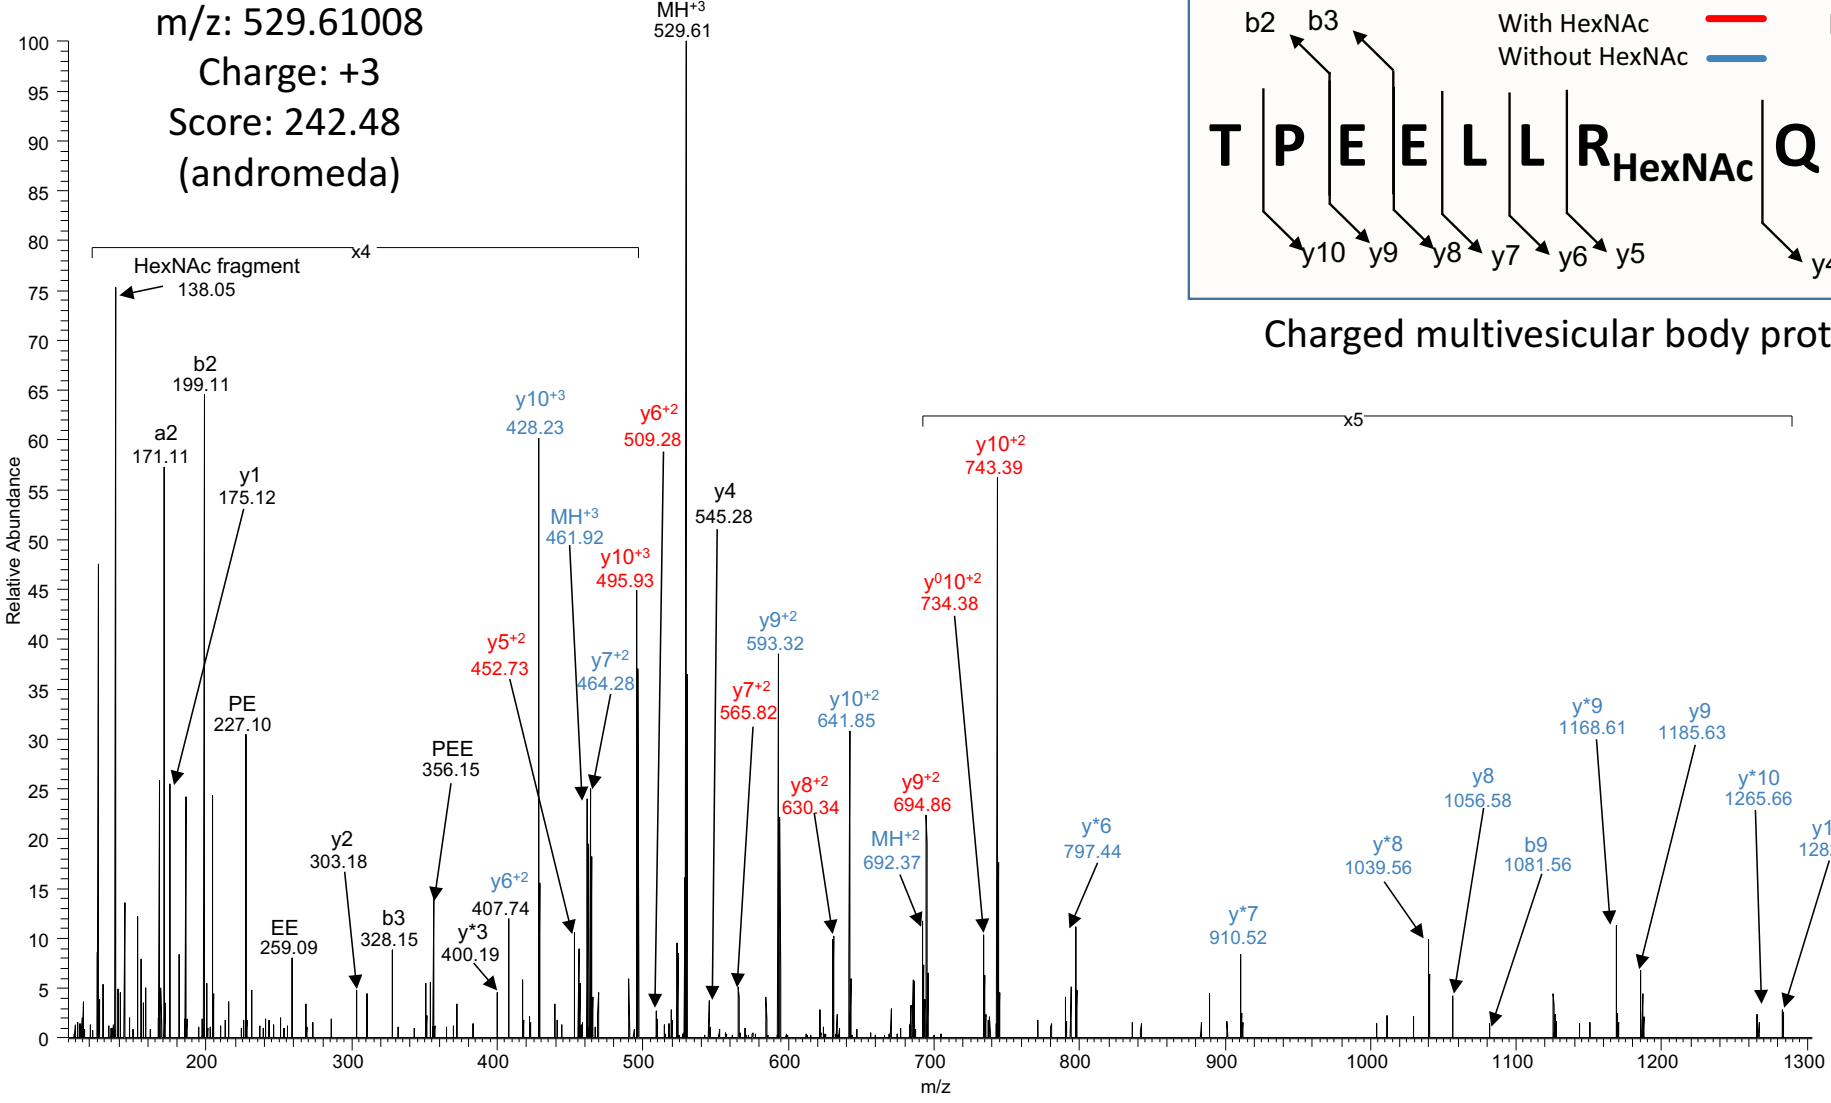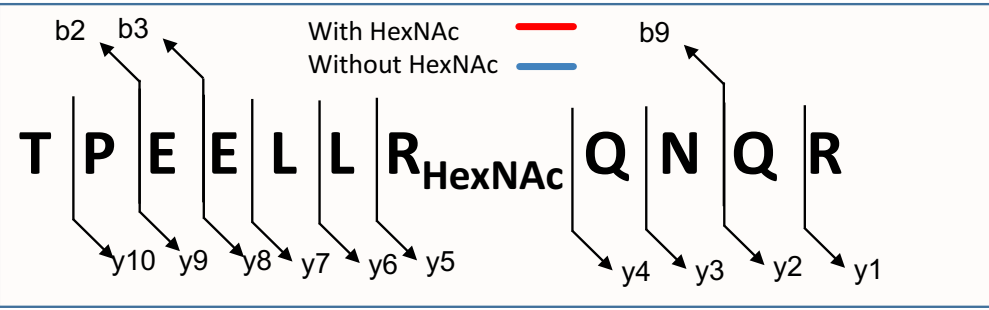

Charged multivesicular body protein 2a- CHMP2A

# HCD fragmentation

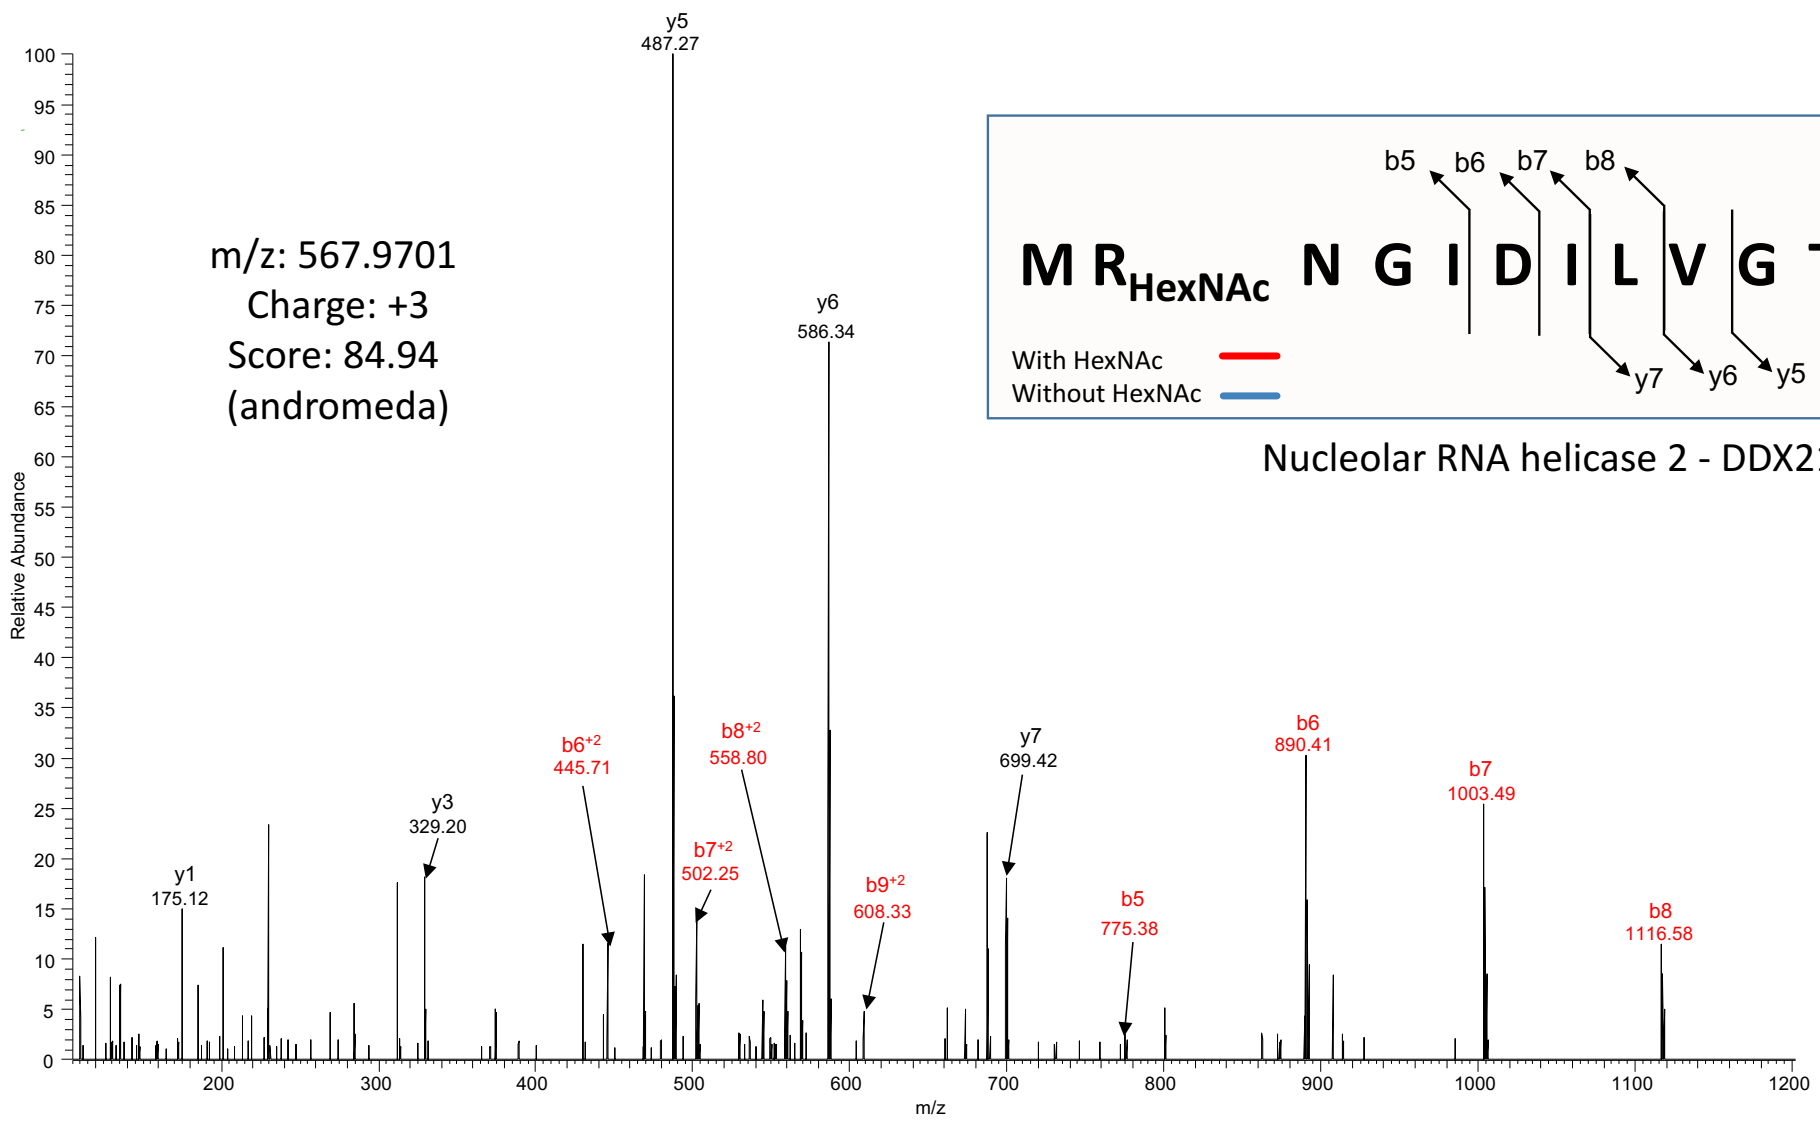

m/z: 567.9701  
 Charge: +3  
 Score: 84.94  
 (andromeda)

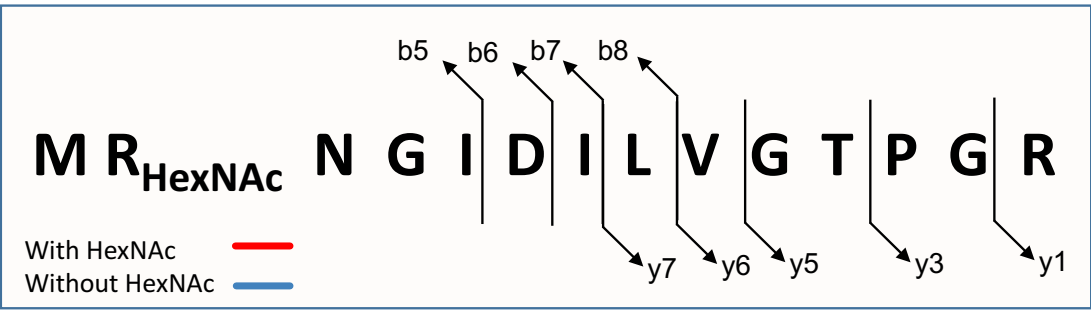

Nucleolar RNA helicase 2 - DDX21



# HCD fragmentation

m/z: 3633.22781  
 Charge: +3  
 Score: 91.783  
 (andromeda)

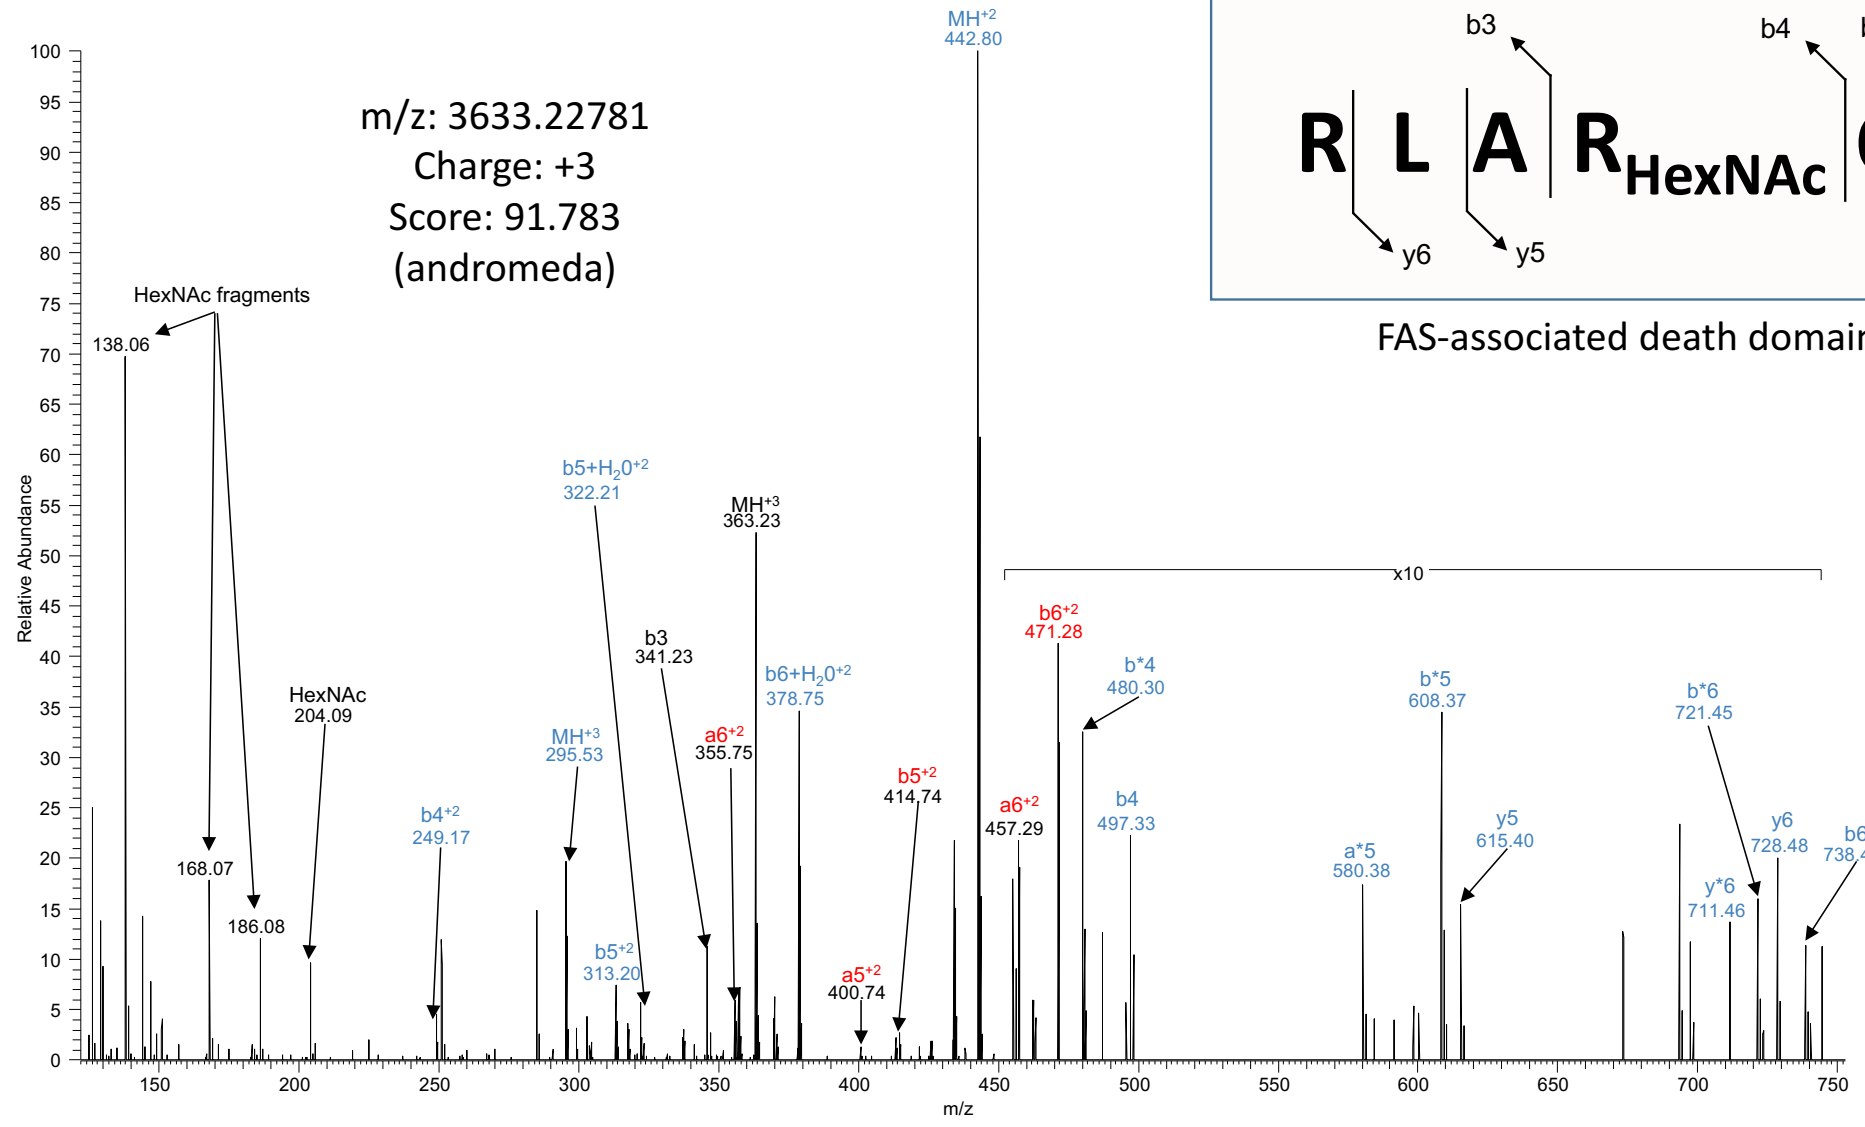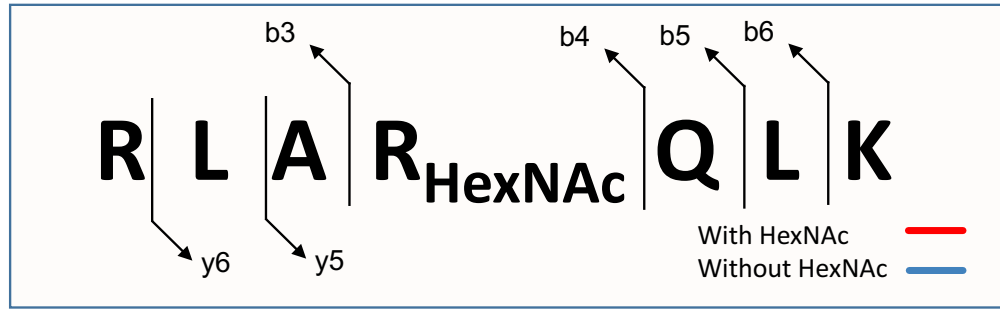

FAS-associated death domain protein-FADD

# HCD fragmentation

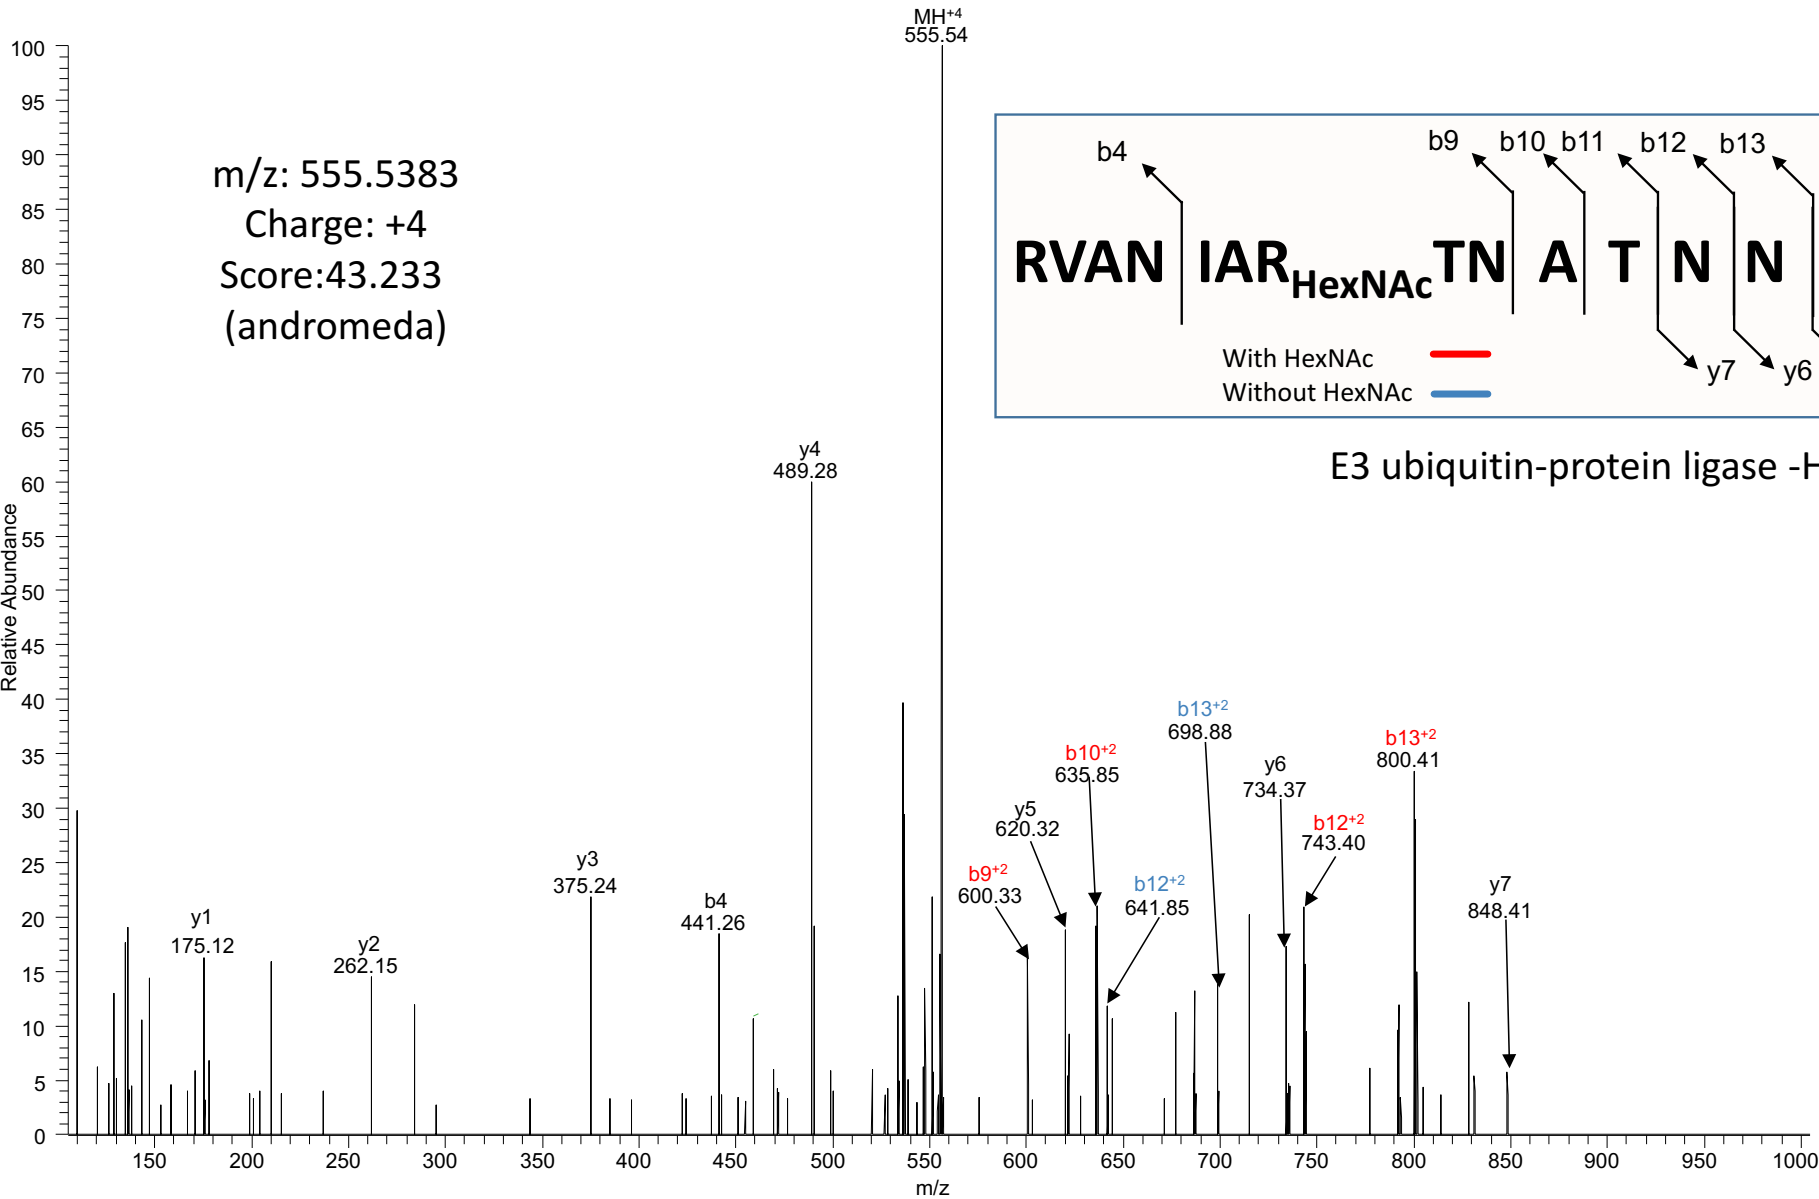

m/z: 555.5383  
Charge: +4  
Score: 43.233  
(andromeda)

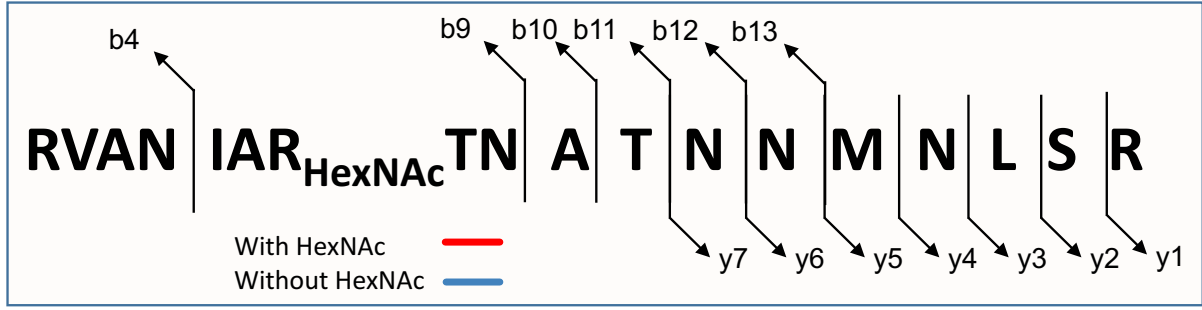

E3 ubiquitin-protein ligase -HECTD1

# HCD fragmentation

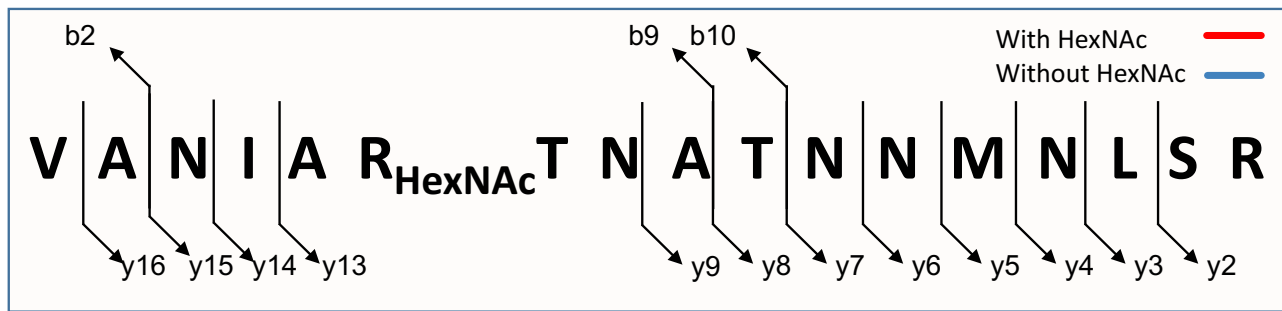

With HexNAc —  
 Without HexNAc —

m/z: 688.3483  
 Charge: +3  
 Score: 104.38  
 (andromeda)

E3 ubiquitin-protein ligase -HECTD1

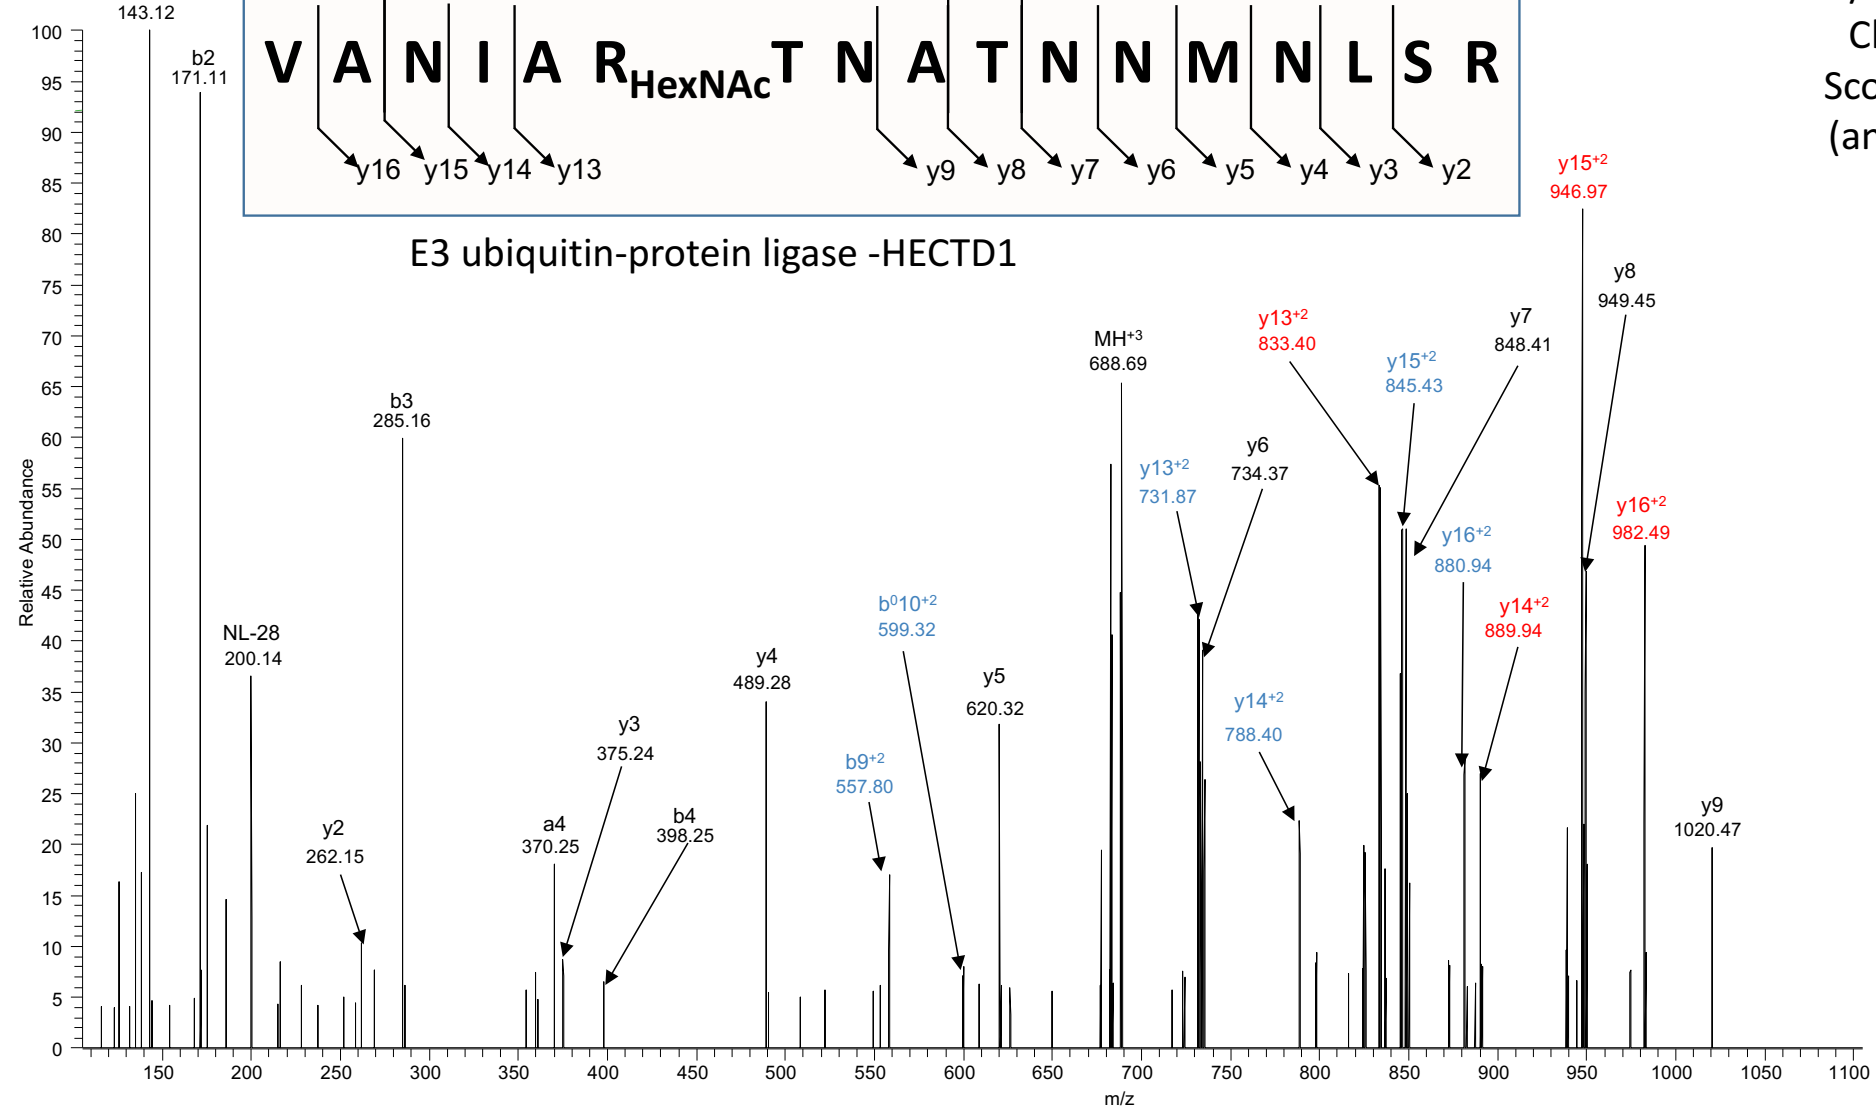

# HCD fragmentation

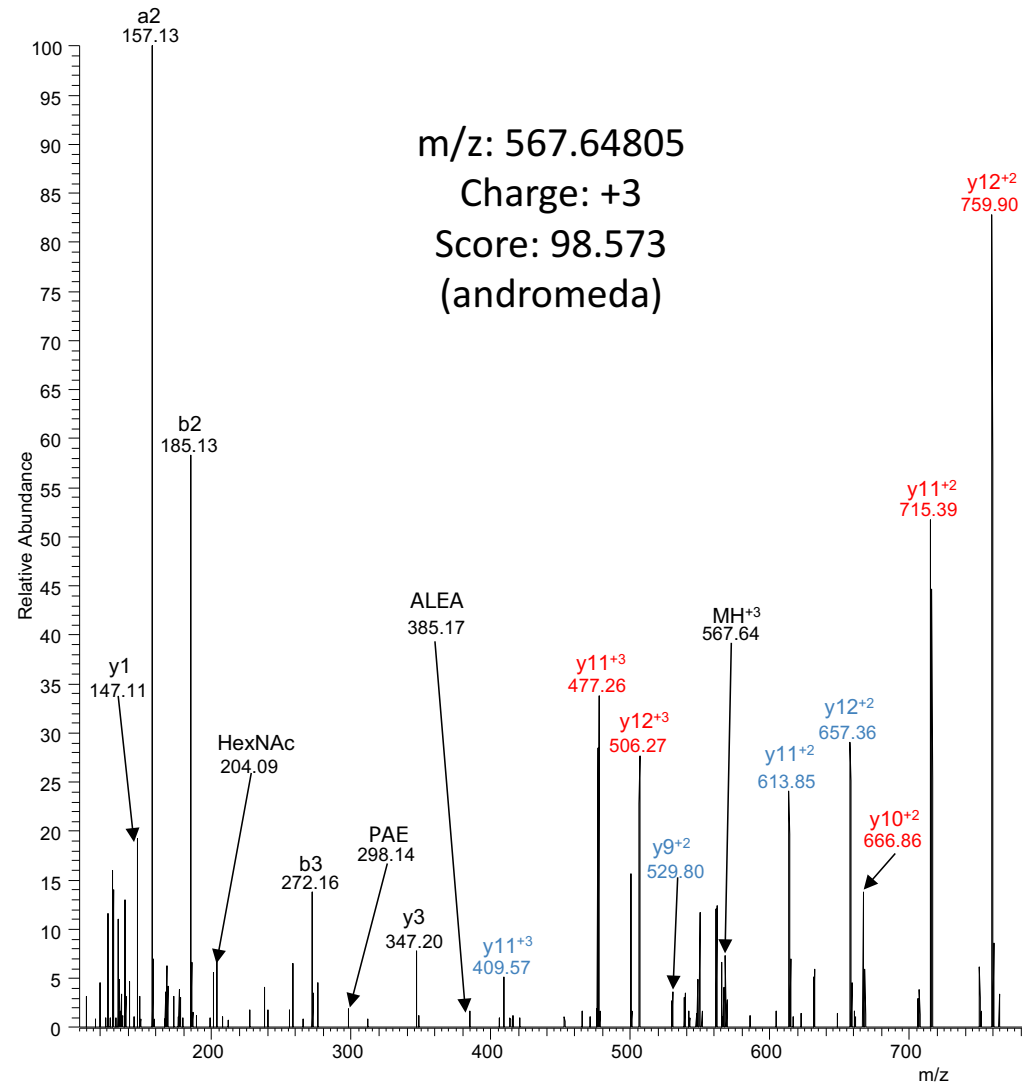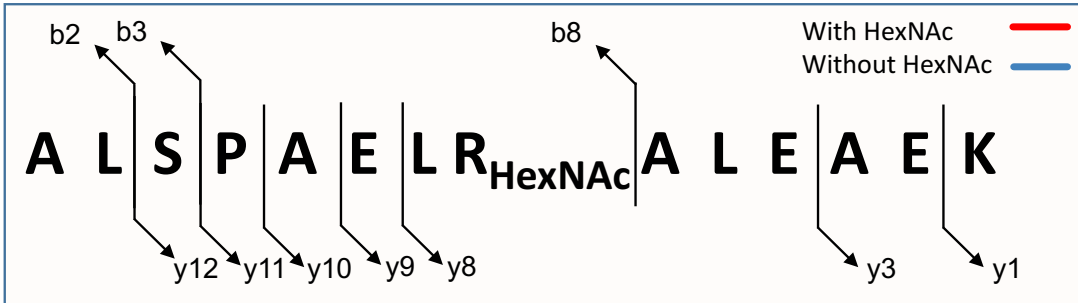

Protein scribble homolog- SCRIB

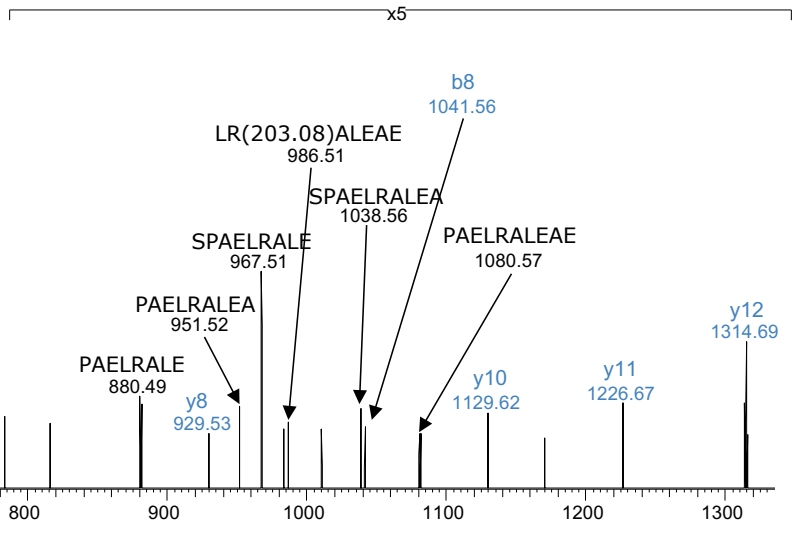

# HCD fragmentation

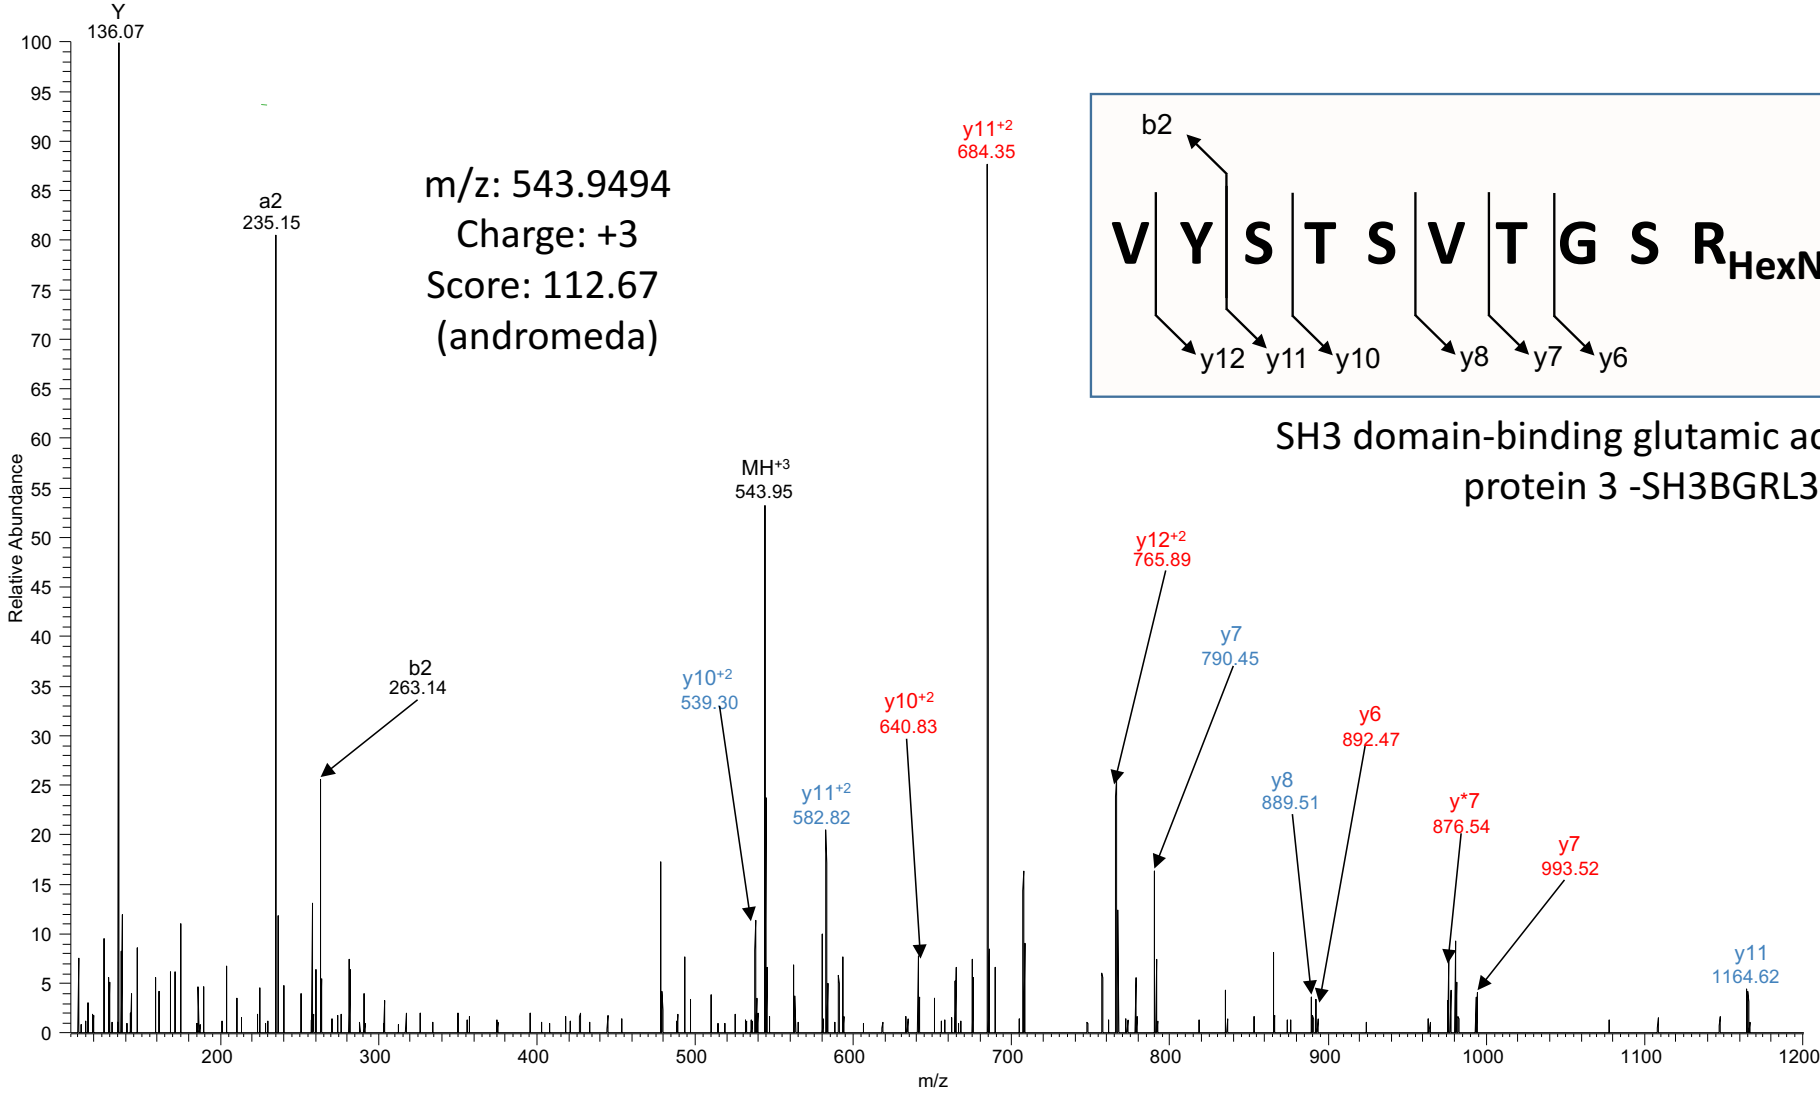

m/z: 543.9494  
 Charge: +3  
 Score: 112.67  
 (andromeda)

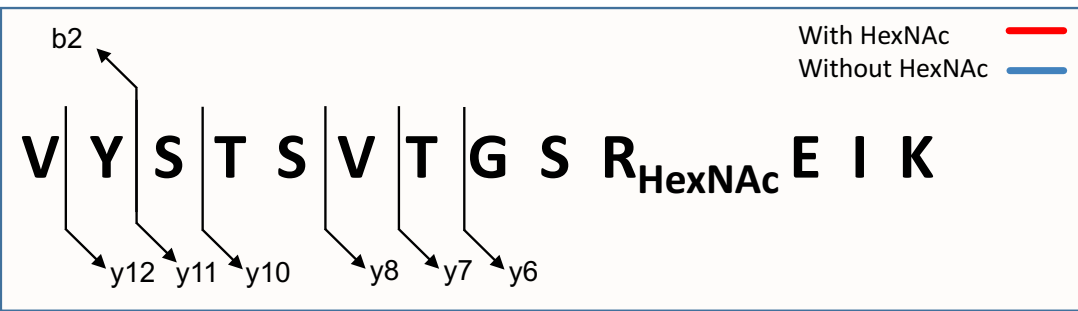

SH3 domain-binding glutamic acid-rich-like protein 3 -SH3BGRL3

# HCD fragmentation

m/z: 382.89505  
 Charge: +3  
 Score: 121.6  
 (andromeda)

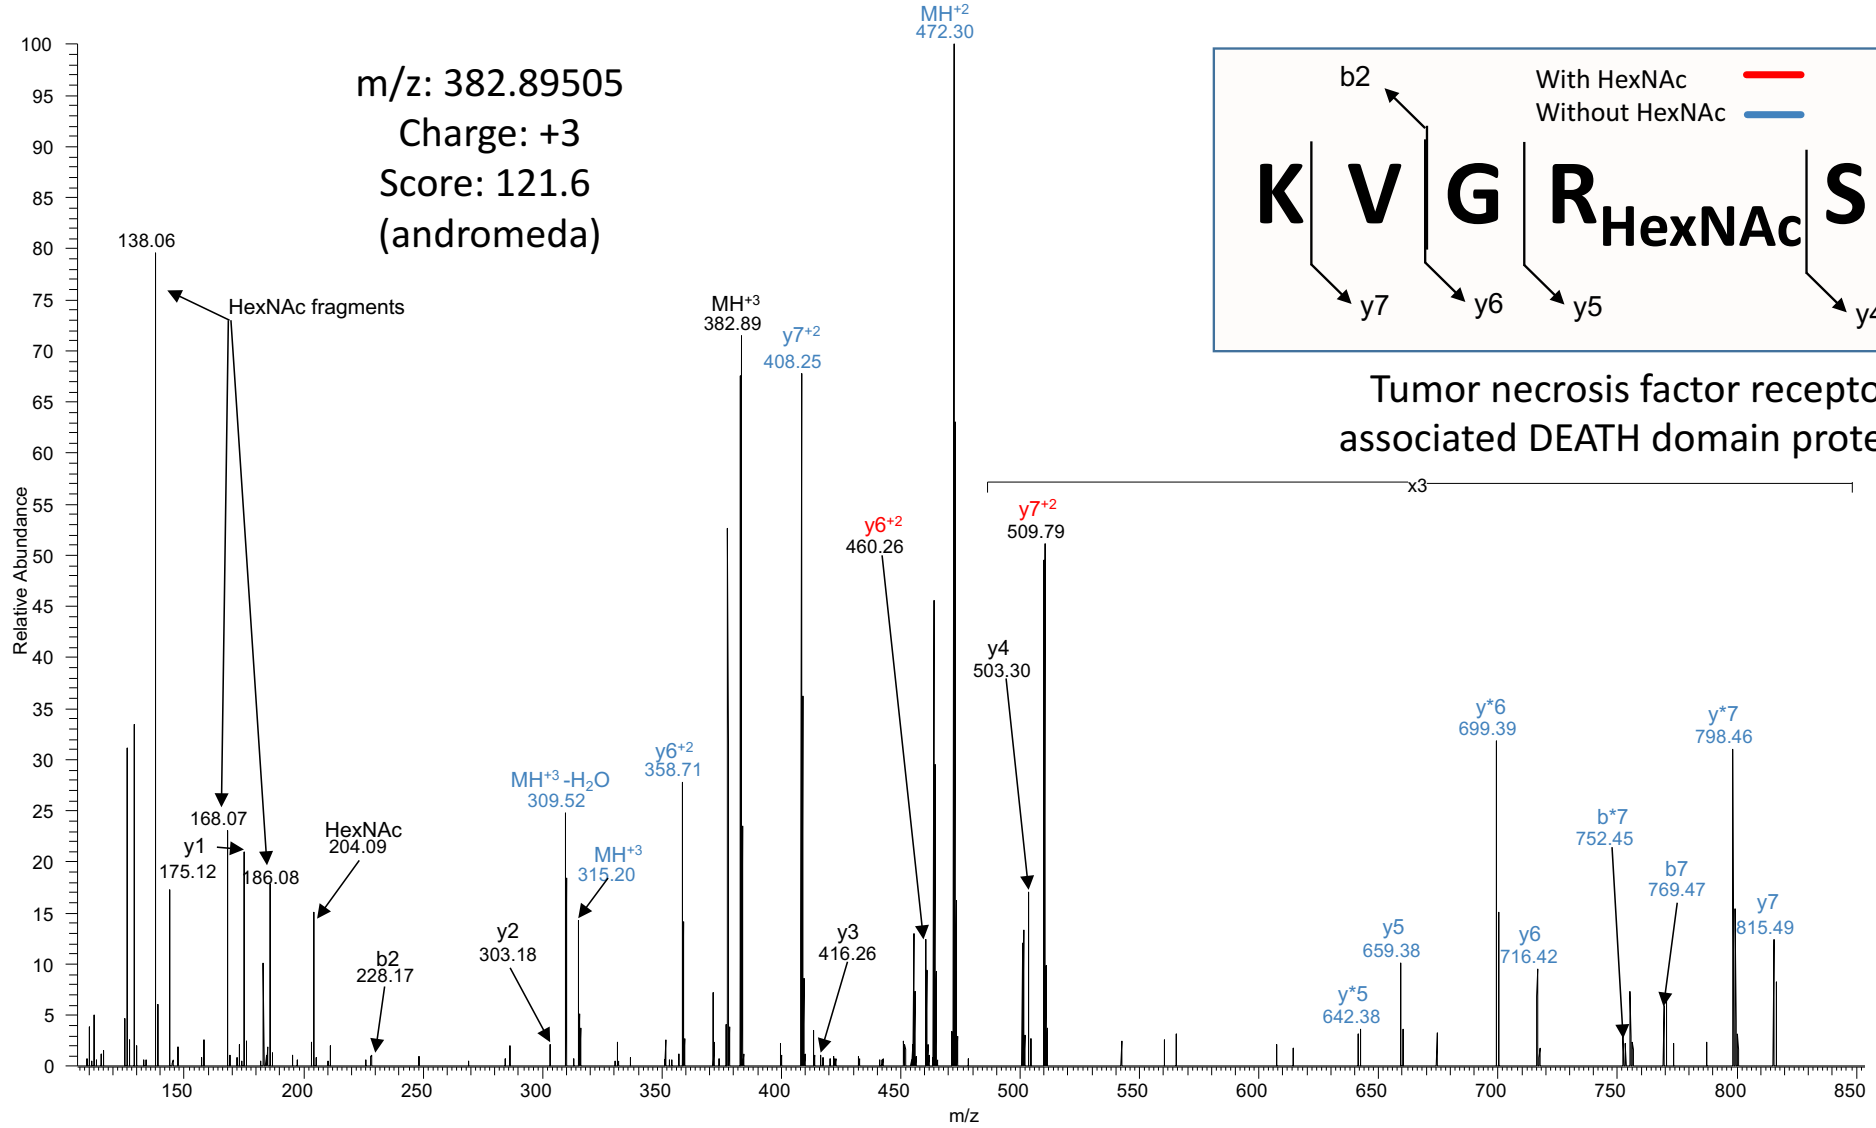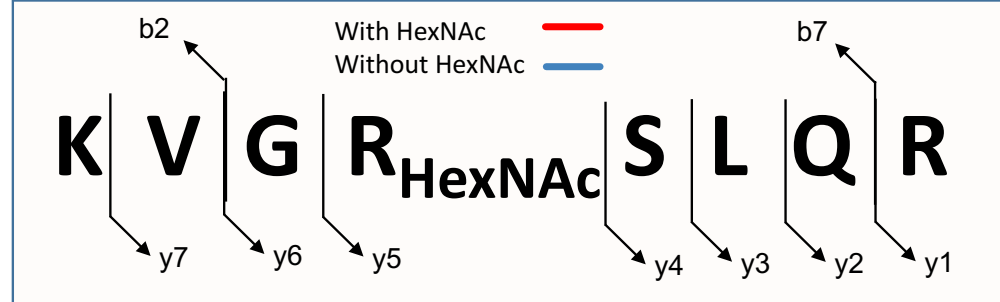

Tumor necrosis factor receptor type 1-associated DEATH domain protein- TRADD

# HCD fragmentation

m/z: 509.78836  
 Charge: +2  
 Score: 87.639  
 (andromeda)

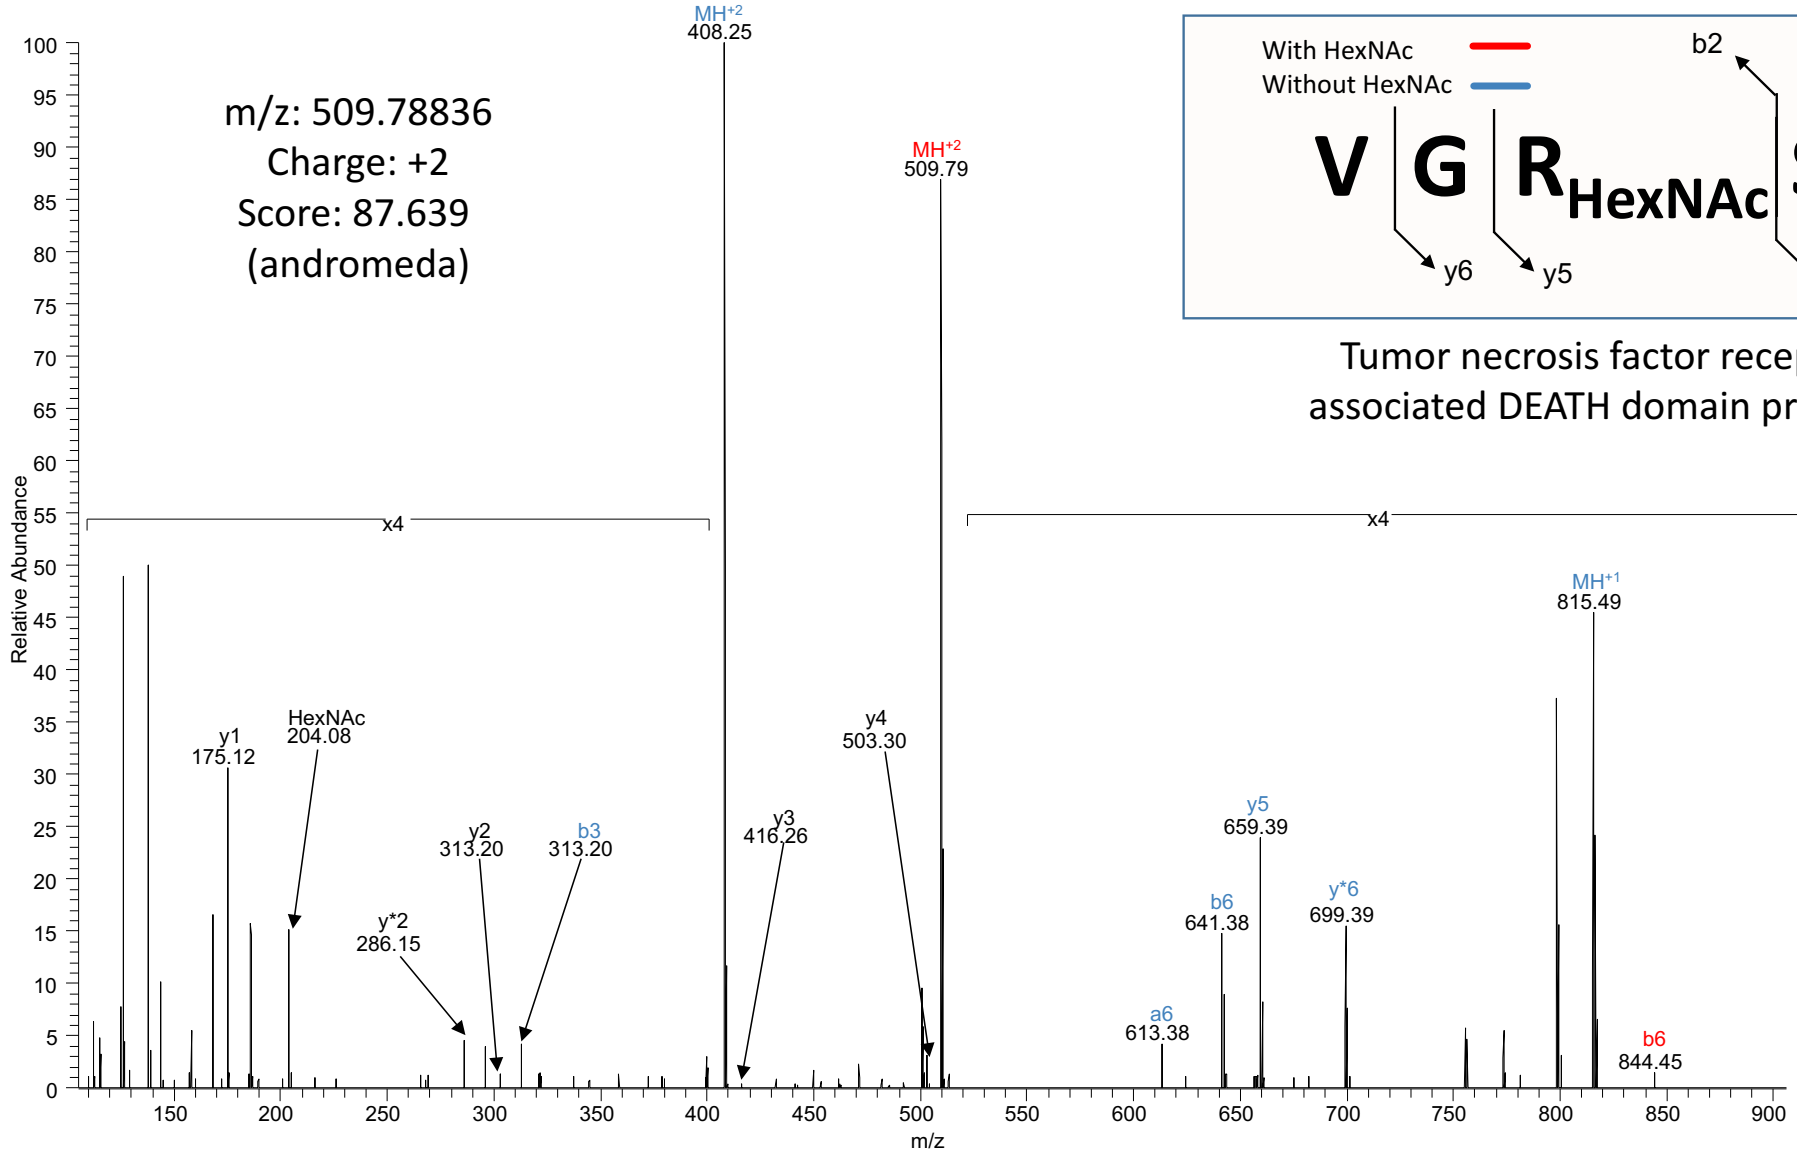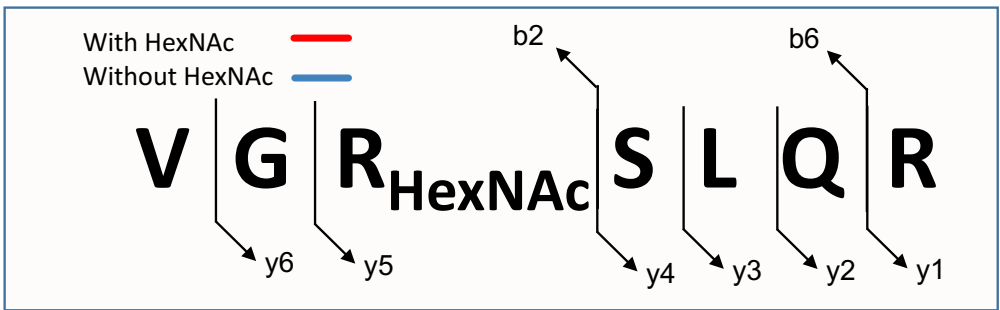

Tumor necrosis factor receptor type 1-associated DEATH domain protein- TRADD

# HCD fragmentation

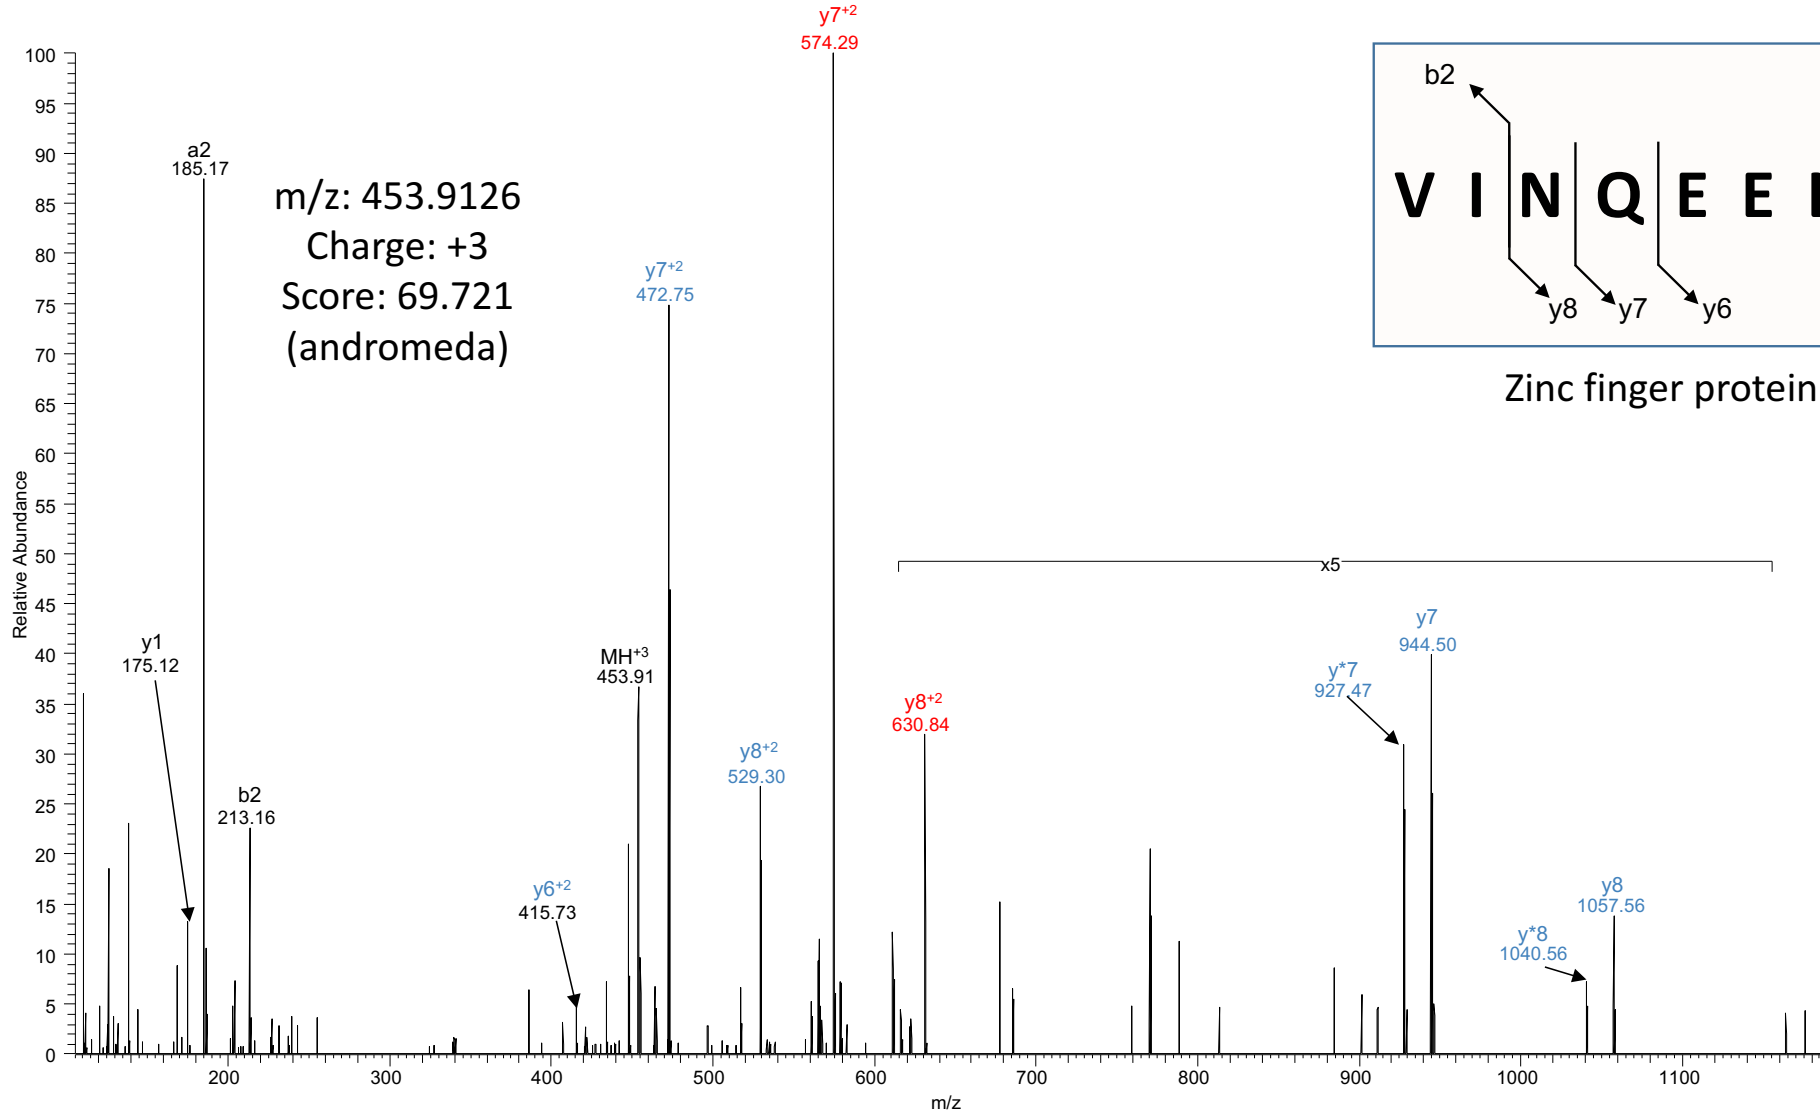

m/z: 453.9126  
Charge: +3  
Score: 69.721  
(andromeda)

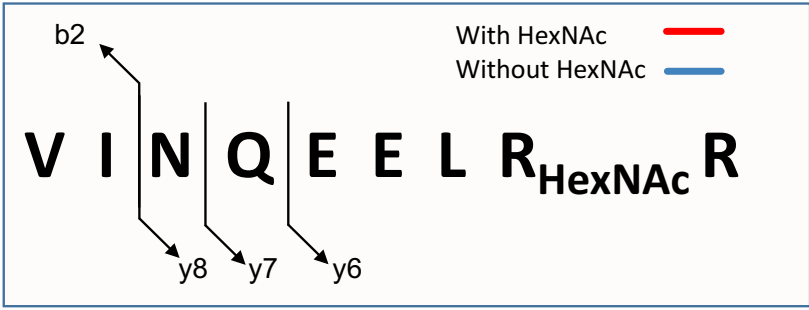

Zinc finger protein 830- ZNF830



# HCD fragmentation

m/z: 386.57593  
 Charge: +3  
 Score: 83.623  
 (andromeda)

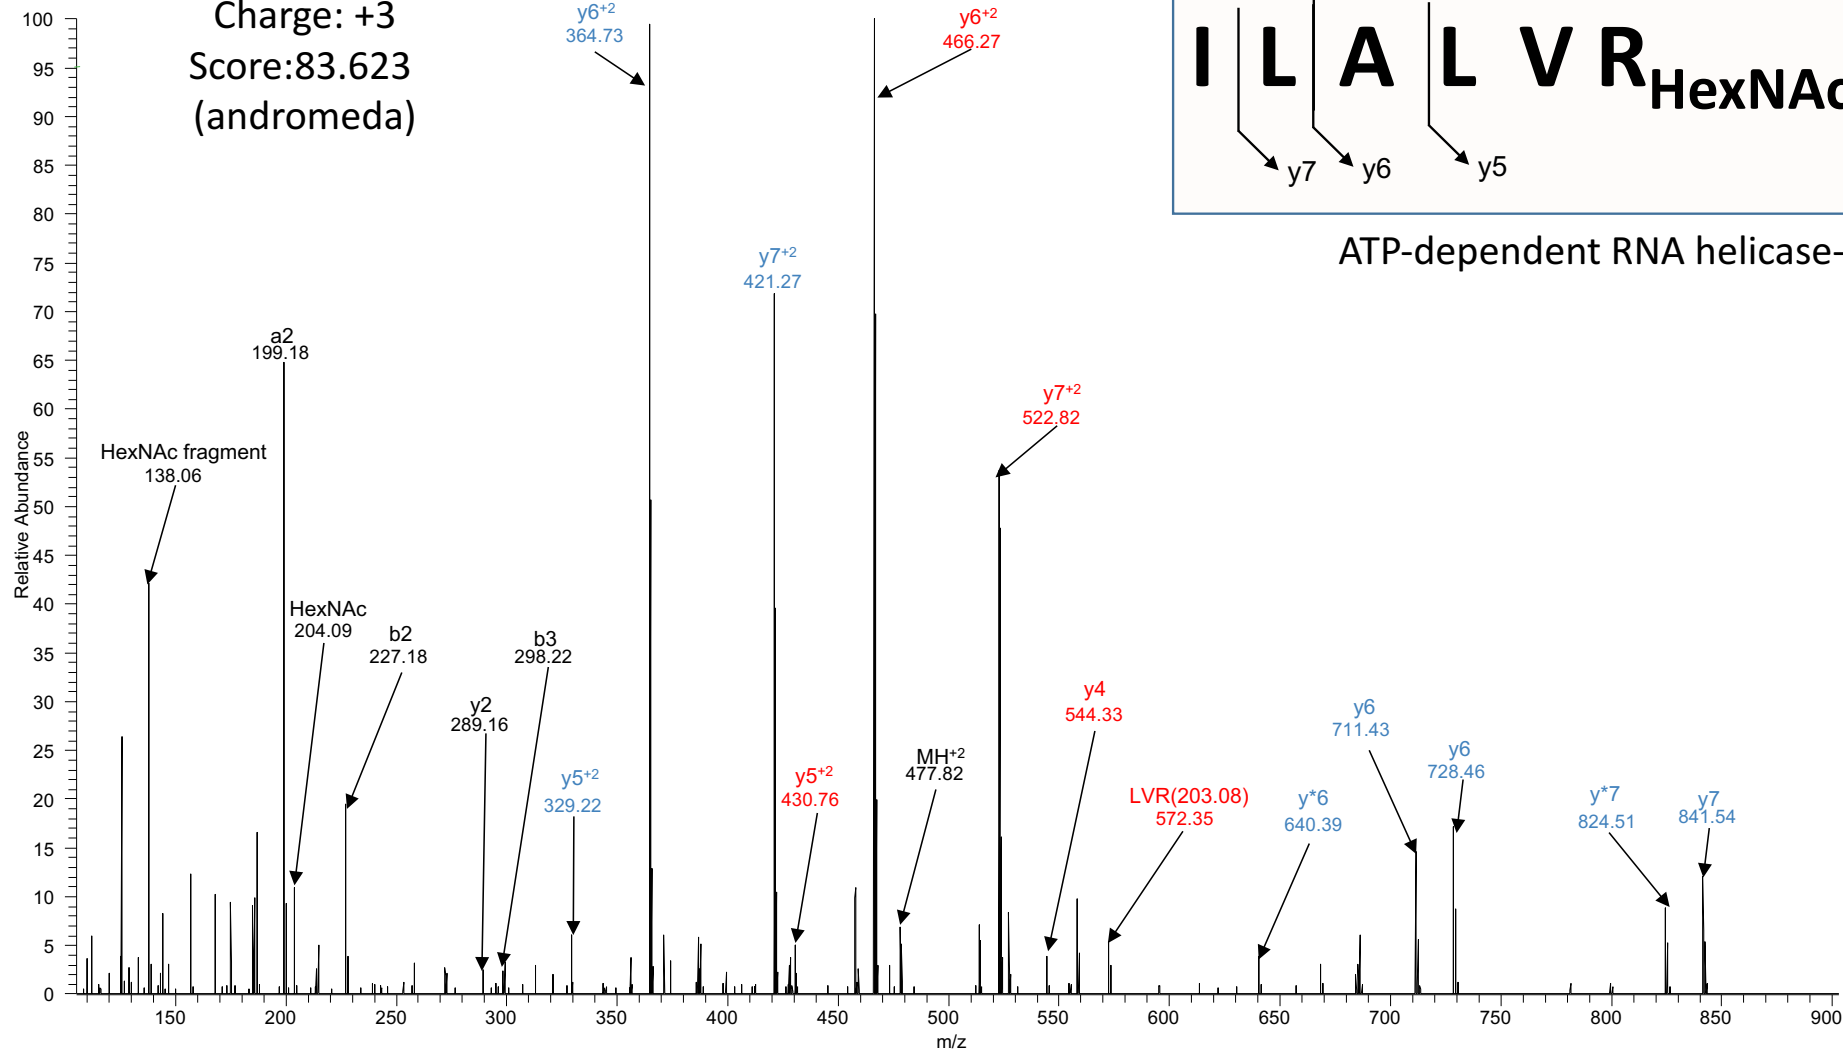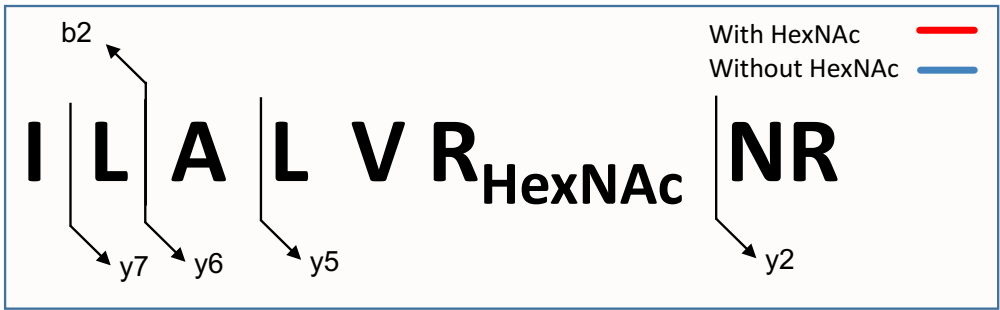

ATP-dependent RNA helicase- DDX39A

With HexNAc —  
 Without HexNAc —

ETD fragmentation

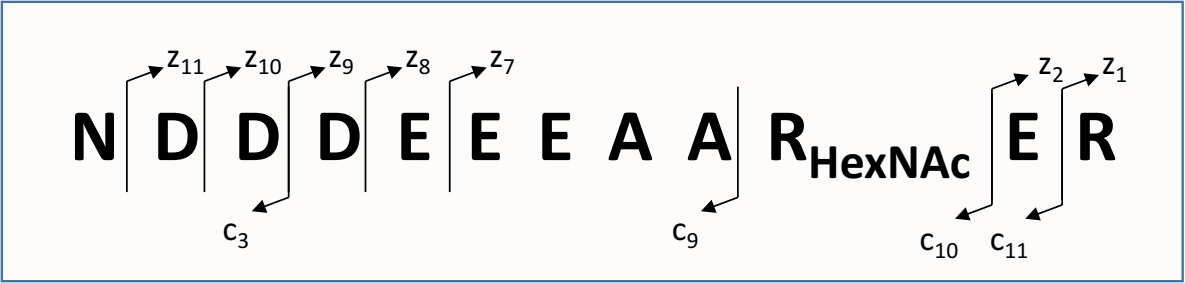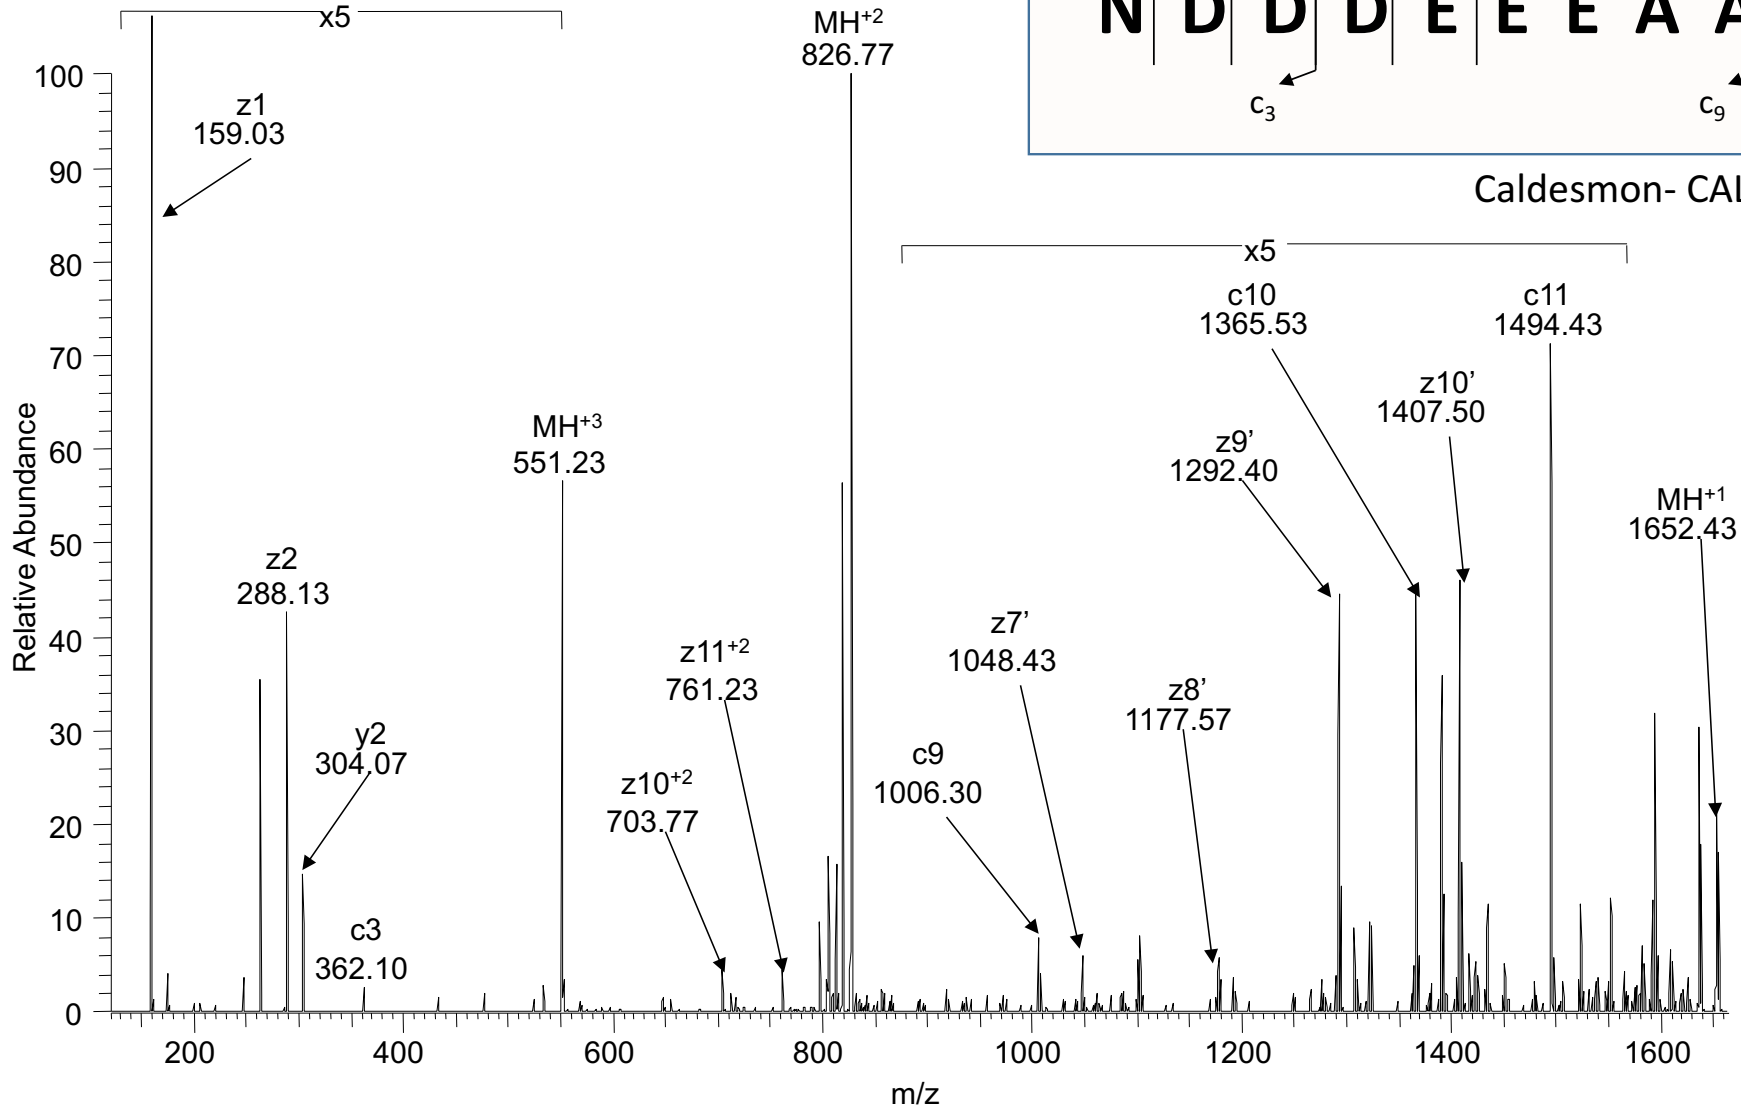

**ETD fragmentation**

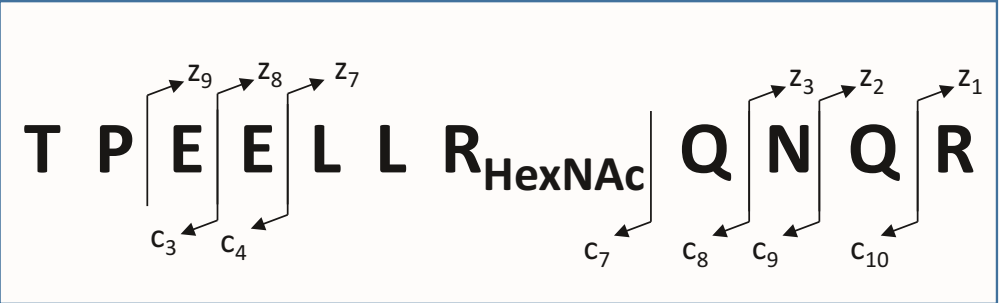

Charged multivesicular body protein 2a- CHMP2A

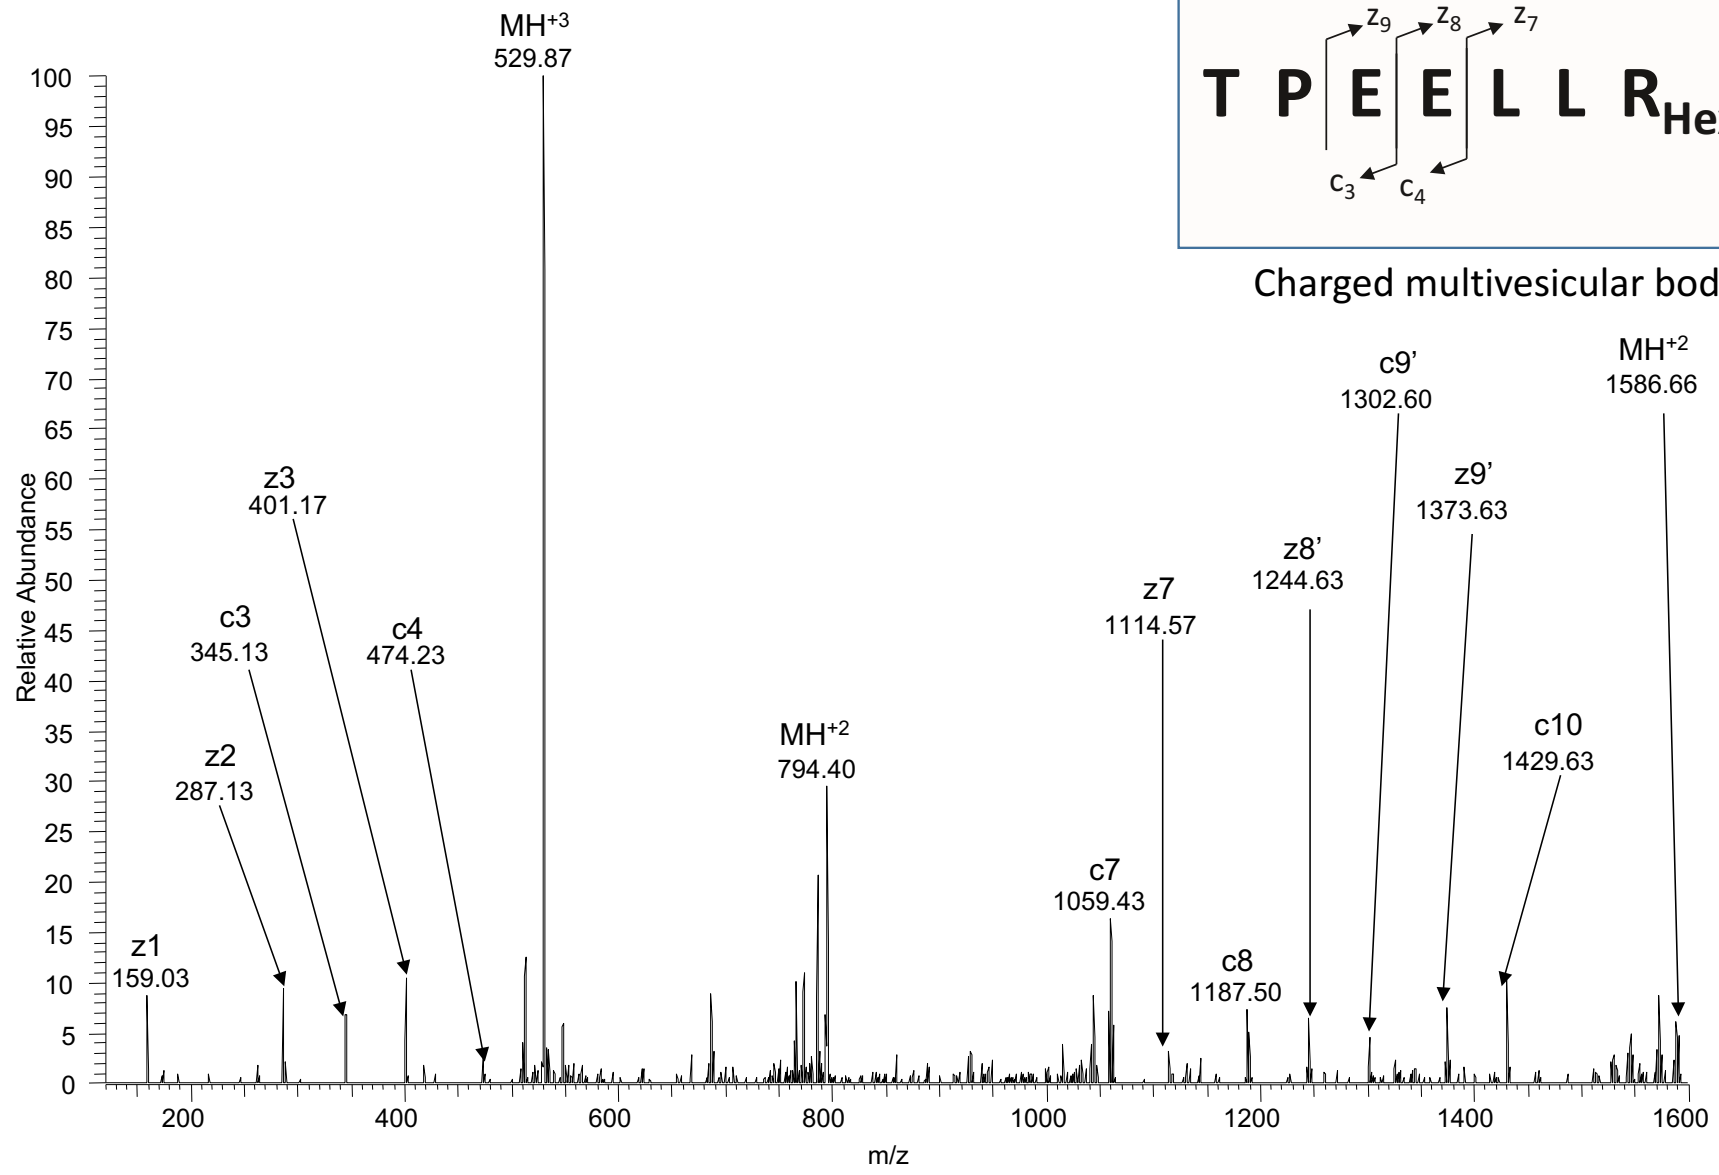

**ETHcD fragmentation**

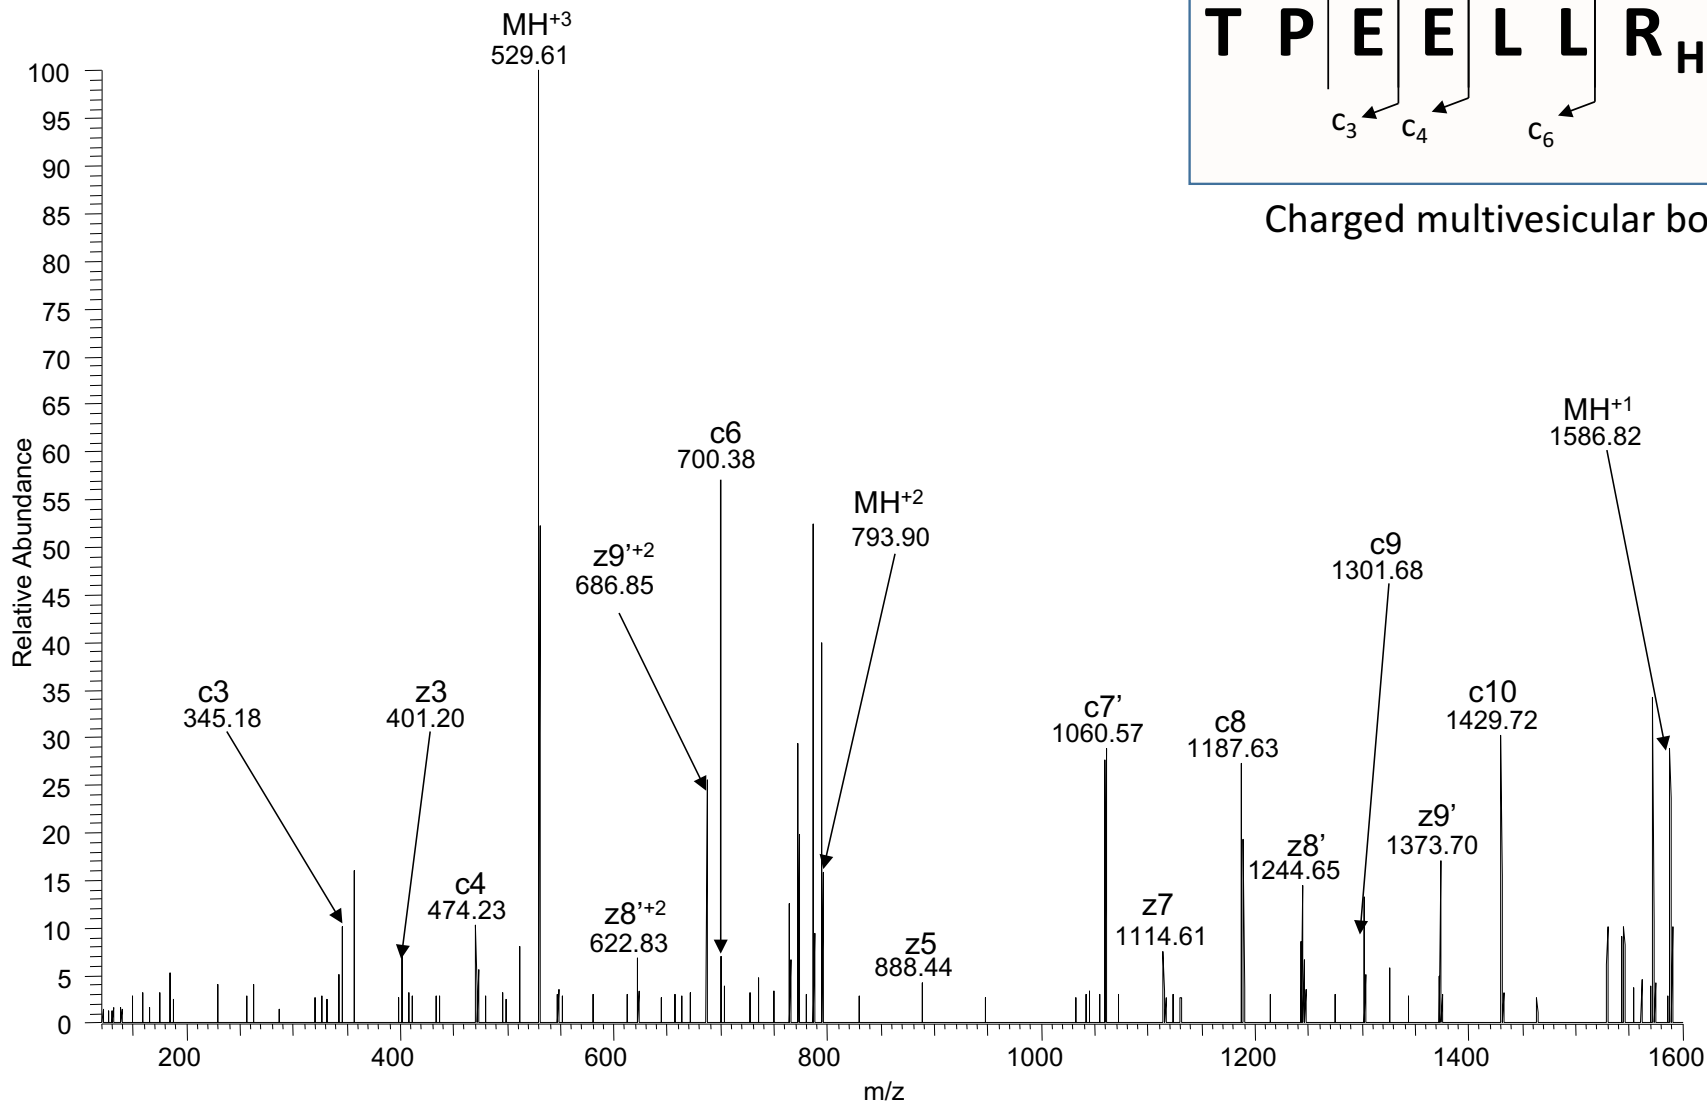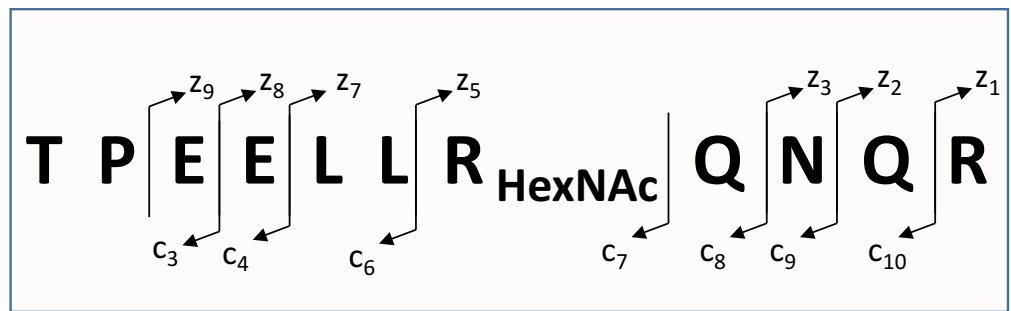

Charged multivesicular body protein 2a- CHMP2A

# ETD fragmentation

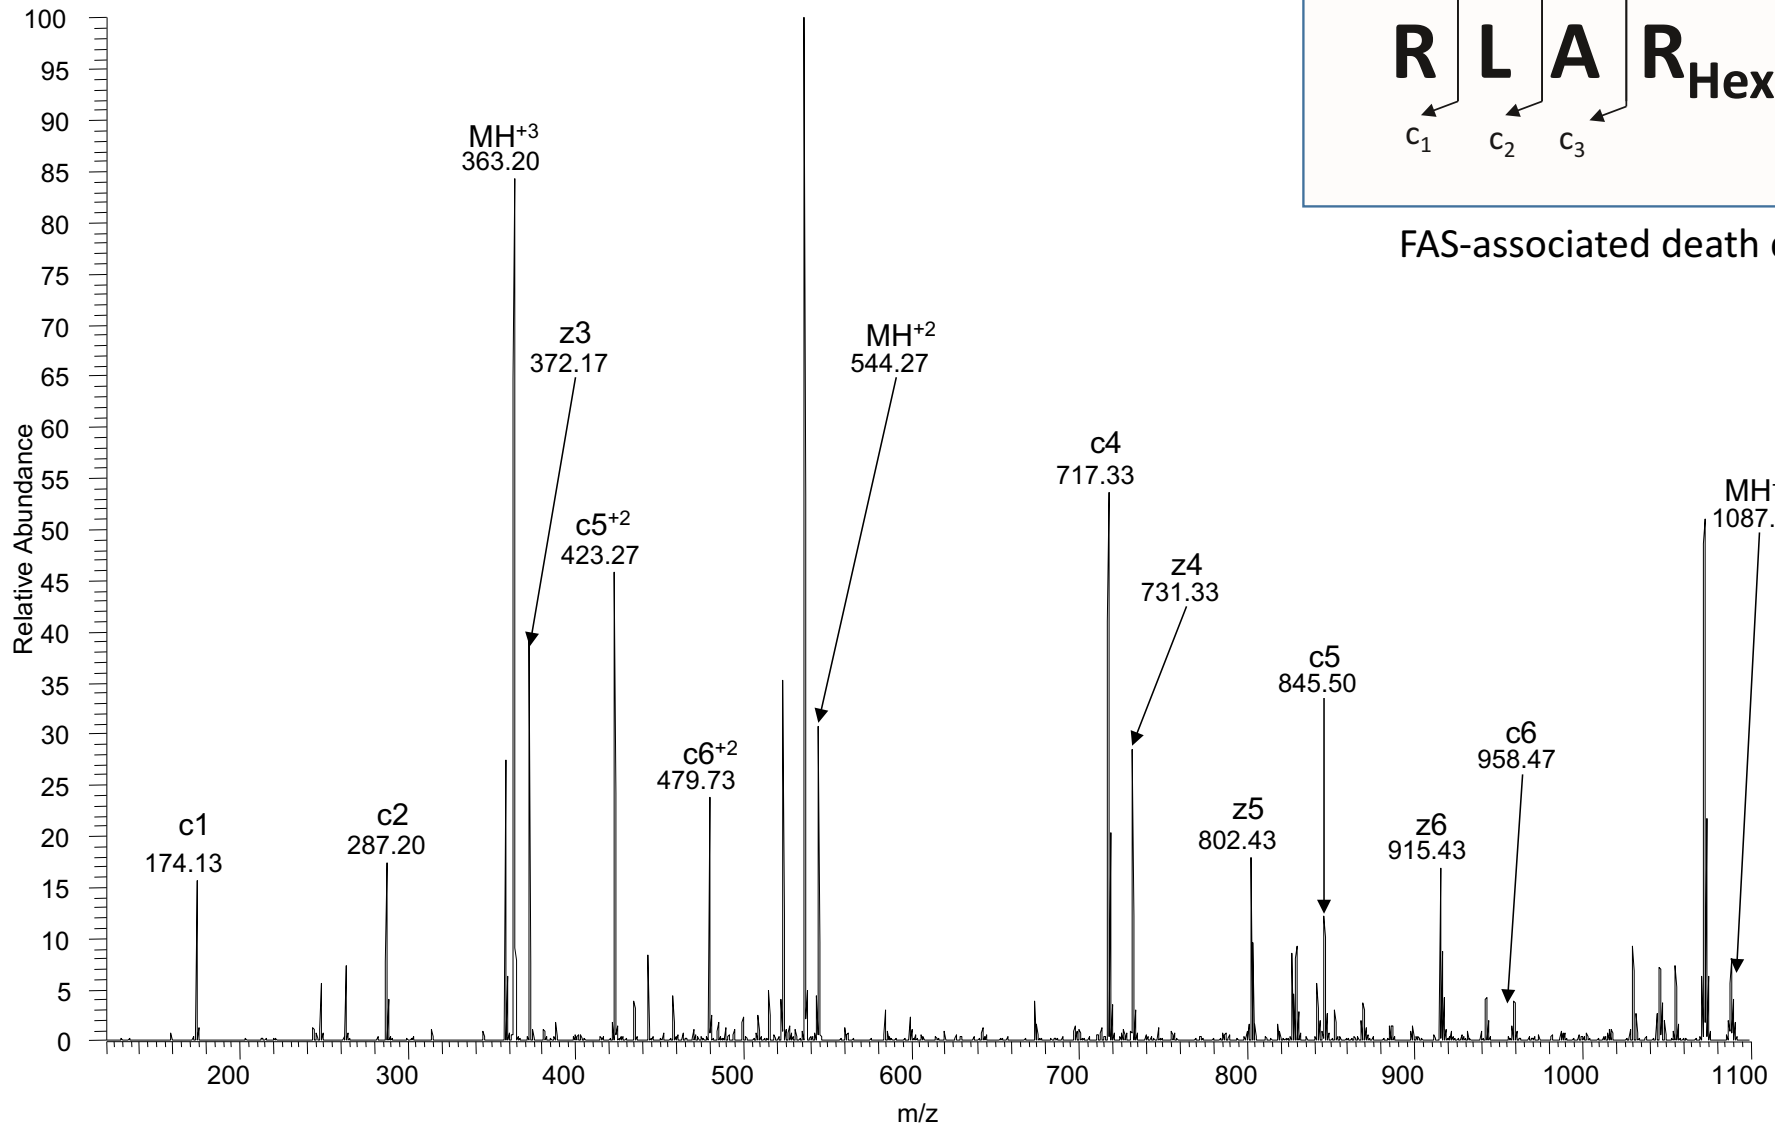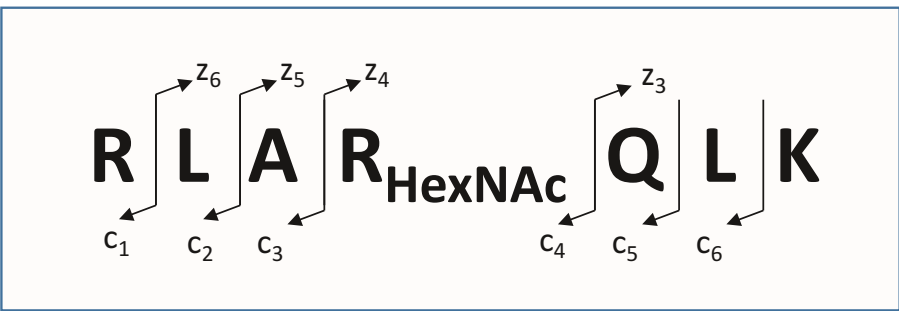

FAS-associated death domain protein-FADD

**ETD fragmentation**

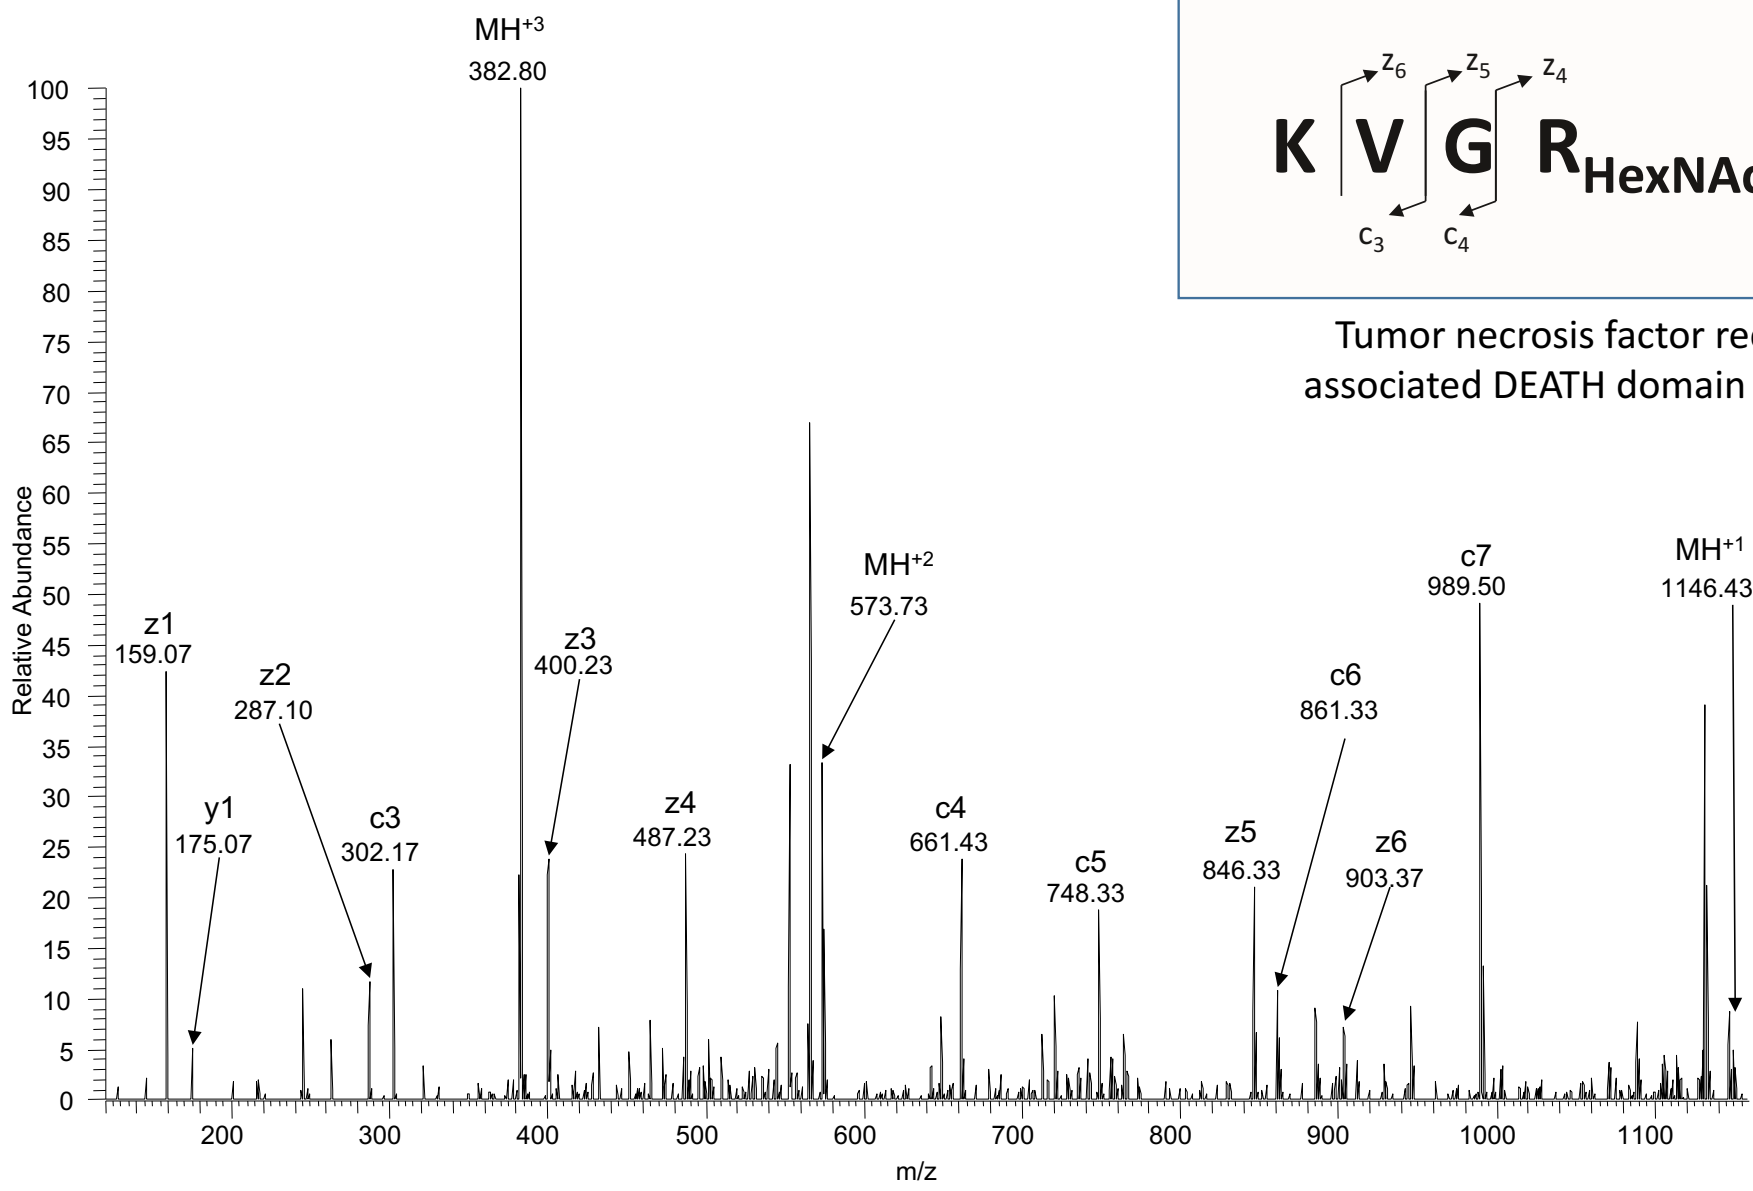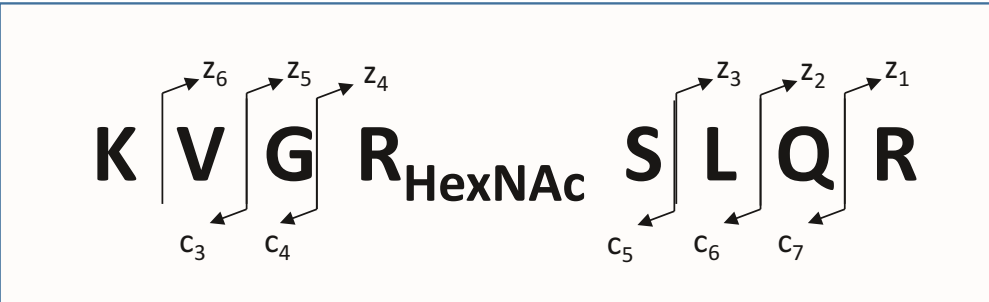

Tumor necrosis factor receptor type 1-associated DEATH domain protein- TRADD

**ETD fragmentation**

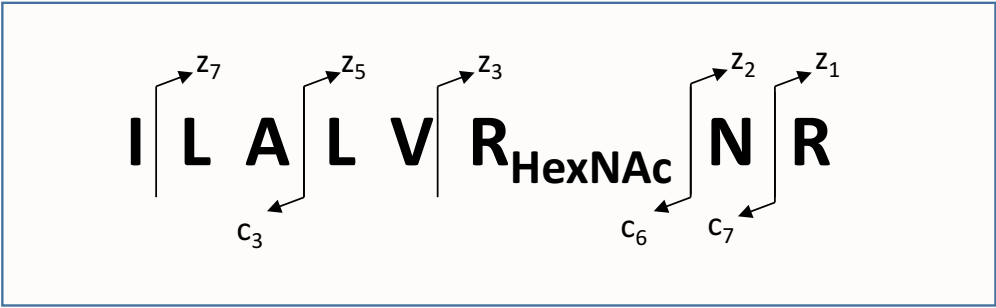

ATP-dependent RNA helicase- DDX39A

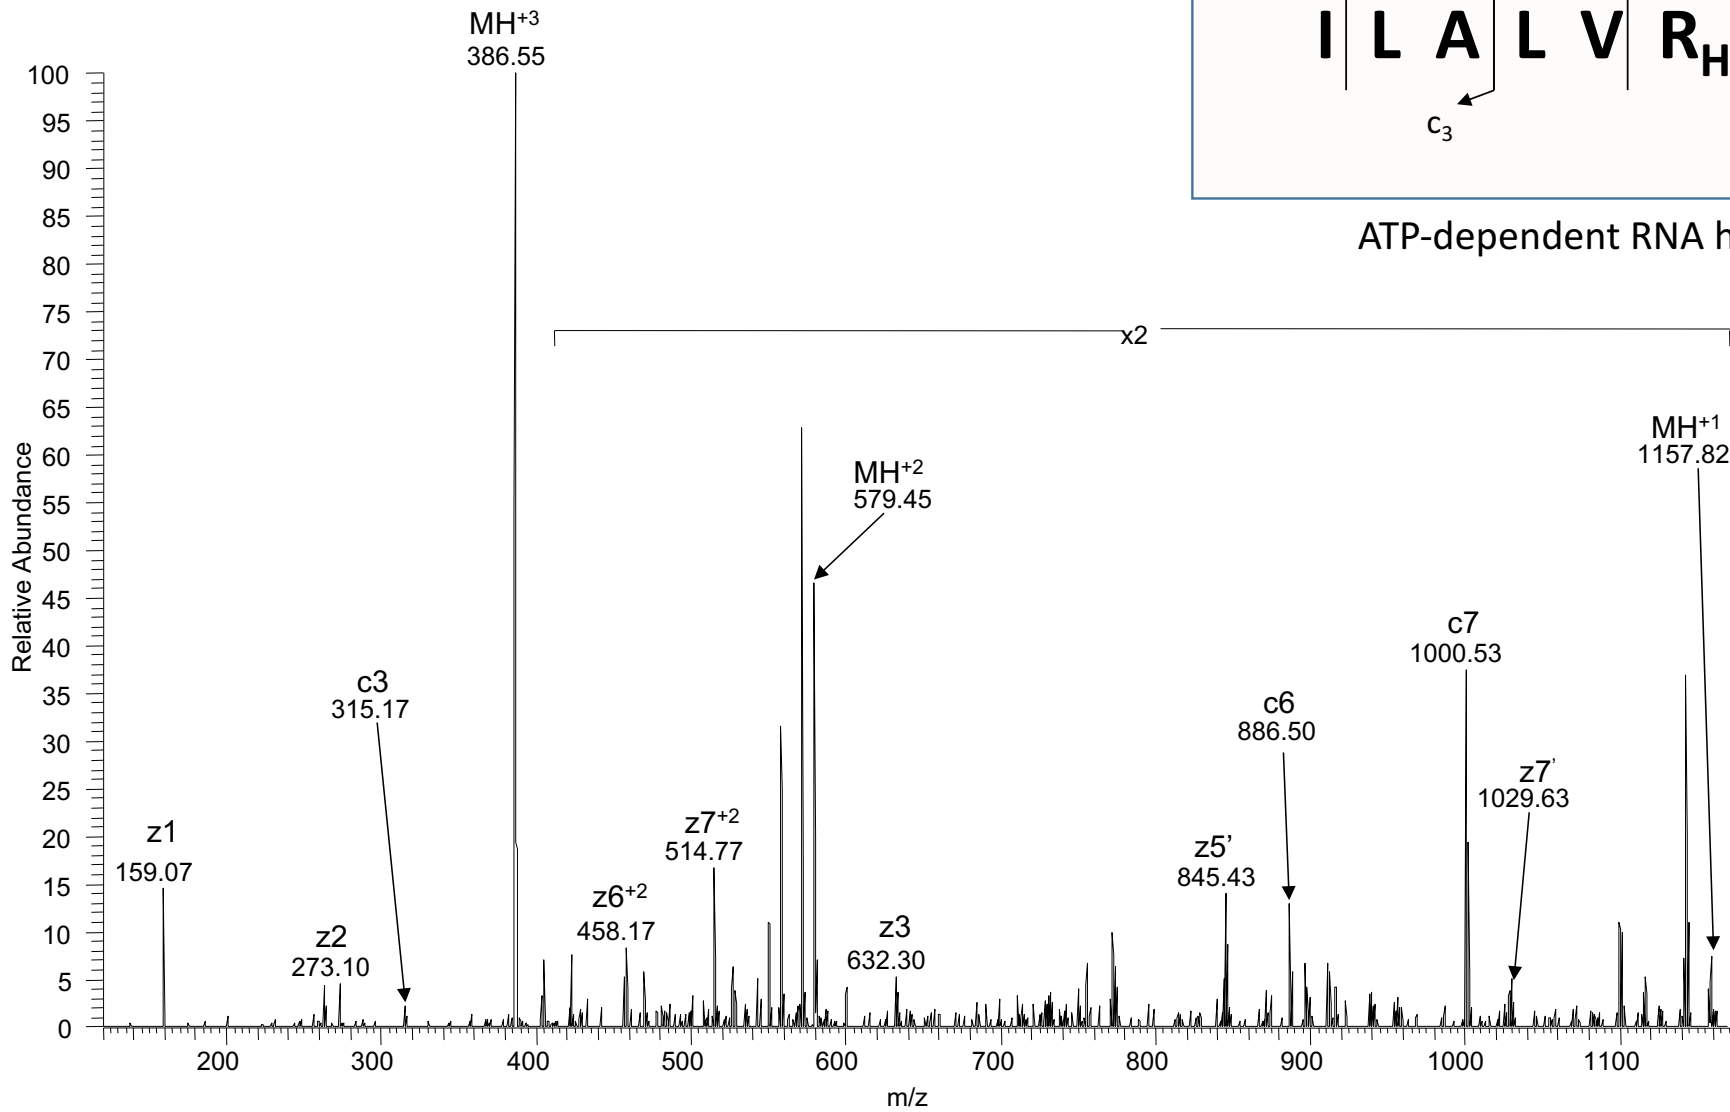

Supplement: 10.1074_M117.805036_jbc.M117.805036-8.pdf [file 10.1074_M117.805036_jbc.M117.805036-8.pdf]
